1 **Involvement of translocon complex in hemoglobin import from infected**  
2 **erythrocyte cytoplasm into the *Plasmodium* parasite**

3 Priya Gupta<sup>1</sup>, Rajan Pandey<sup>2</sup>, Vandana Thakur<sup>3</sup>, Sadaf Parveen<sup>1</sup>, Inderjeet Kaur<sup>1</sup>, Ashutosh  
4 Panda<sup>1</sup>, Rashmita Bishi<sup>1</sup>, Sonali Mehrotra<sup>1</sup>, Dinesh Gupta<sup>2</sup>, Asif Mohammed<sup>3</sup>, Pawan  
5 Malhotra<sup>1\*</sup>

6 <sup>1</sup>Malaria Biology Group, International Centre for Genetic Engineering and Biotechnology,  
7 Aruna Asaf Ali Marg, New Delhi-110067, India

8 <sup>2</sup>Translational Bioinformatics Group, International Centre for Genetic Engineering and  
9 Biotechnology, Aruna Asaf Ali Marg, New Delhi-110067, India

10 <sup>3</sup>Parasite Cell Biology Group, International Centre for Genetic Engineering and  
11 Biotechnology, Aruna Asaf Ali Marg, New Delhi-110067, India

12 \*To whom correspondence should be addressed.

13 E-mail: [pawanm@icgeb.res.in](mailto:pawanm@icgeb.res.in), [pawanmal@gmail.com](mailto:pawanmal@gmail.com)

14

15

16

17

18

19 **Abbreviations:** HDP - Heme Detoxification Protein, Exp-2 - exportin2, Hb - hemoglobin

20

21

22

23

## 24 Abstract

25 Haemoglobin degradation is crucial for the growth and survival of *Plasmodium falciparum* in  
26 human erythrocytes. Although the process of Hb degradation has been studied in great detail,  
27 the mechanisms of Hb uptake remain ambiguous to date. Here, we characterized Heme  
28 Detoxification Protein (*PfHDP*), a protein localized in the parasitophorous vacuole, parasite  
29 food vacuole and infected erythrocyte cytosol for its role in Hb uptake. Immunoprecipitation  
30 of *PfHDP*-GFP fusion protein from a transgenic line using anti-GFP antibody and of  
31 *Plasmodium* parasite extract using anti-human Hb antibodies respectively, showed the  
32 association of *PfHDP*/Hb with each other as well as with the members of PTEX translocon  
33 complex. Some of these associations such as *PfHDP*/Hb and *PfHDP*/*Pfexp-2* interactions  
34 were confirmed by *in vitro* protein-protein interaction tools. To know the roles of *PfHDP* and  
35 translocon complex in Hb import into the parasites, we next studied the Hb uptake by the  
36 parasite in *PfHDP* knock-down line using the GlmS ribozyme strategy. *PfHDP* knock-down  
37 significantly reduced the Hb uptake in these parasites in comparison to the wild type  
38 parasites. Further, the transient knock-down of one of the members of the translocon  
39 complex; *PfHSP101* showed considerable reduction in Hb uptake. Morphological analysis of  
40 *PfHDP*-HA-GlmS transgenic parasites in the presence of GlcN showed food vacuole  
41 abnormalities and parasite stress, thereby causing a growth defect in the development of these  
42 parasites. Together, we implicate the translocon complex in the trafficking of *PfHDP*/Hb  
43 complex in the parasite and suggest a role for *PfHDP* in the uptake of Hb and parasite  
44 development. The study thus reveals new insights into the function of *PfHDP*, making it an  
45 extremely important target for developing new antimalarials.

46

47

48

49

50

## 51 **Introduction**

52 *Plasmodium falciparum* is a leading cause of malaria with 219 million malaria cases and  
53 4,35,000 deaths reported worldwide in the year 2018 (Organization 2019). Although drug  
54 therapies and vector control mechanisms for the containment of the disease have been  
55 developed, eradication of malaria has not been achieved yet (Rathore, McCutchan et al.  
56 2005). The spread of resistance against the available antimalarials and unavailability of a  
57 highly efficacious vaccine poses a greater challenge to eradicate this dreaded disease. Early  
58 resistance against the artemisinin combination therapies, a present-day front-line therapy, had  
59 been reported in western Cambodia, later spreading across an expanding area of the Greater  
60 Mekong subregion (Woodrow and White 2017). Hence, there is an urgent need to identify  
61 new drug targets and molecules that can be targeted to develop effective vaccines to prevent  
62 the disease spread.

63 During the asexual stage of life cycle inside the human erythrocyte, the parasite digests Hb in  
64 a specialized organelle, the food vacuole. Hb is digested by the sequential action of a  
65 complex of proteases including plasmepsins, falcipains and falcilysin inside the food vacuole  
66 (Luker, Francis et al. 1996, Francis, Banerjee et al. 1997, Liu, Gluzman et al. 2005, Singh,  
67 Sijwali et al. 2006). These proteases cleave Hb to short peptides and finally to amino acids  
68 (Dalal and Klemba 2007). The free toxic by-product, heme, generated during the process is  
69 subsequently converted into an inert insoluble polymer; hemozoin (Ashong, Blench et al.  
70 1989, Egan, Combrinck et al. 2002, Egan 2008). *PfHDP*, (Heme Detoxification Protein) has  
71 been shown to be extremely potent in converting heme to hemozoin (Jani, Nagarkatti et al.  
72 2008). *PfHDP*, a food vacuole associated protein, possesses two heme binding sites and a Hb  
73 binding site (Gupta, Mehrotra et al. 2017) and is a part of a ~200 kDa complex with other  
74 proteins including falcipain 2/2, Plasmepsin II, Plasmepsin IV, and histo-aspartic protease  
75 inside the food vacuole (Chugh, Sundararaman et al. 2013).

76 Although the mechanism of Hb degradation has been extensively studied; the mechanisms of  
77 uptake of the Hb from infected erythrocyte cytosol to the parasite remains poorly understood.  
78 Four distinct pathways have been proposed to assist in the uptake of Hb (Elliott, McIntosh et  
79 al. 2008, Lazarus, Schneider et al. 2008). The uptake begins with the folding of parasites  
80 around erythrocyte cytoplasm followed by the development of vesicles and cytostomes that  
81 continue uptake of Hb inside the parasite. After this step, phagosomes appear, which assist in  
82 the trafficking of Hb. Finally, cytostomal invaginations elongate to form tubes that connect to

83 the digestive vacuole at one end and to the parasite surface at the other end, opening to the  
84 erythrocyte cytosol. Despite all the microscopic evidence available, the molecules and  
85 adaptors that participate in delivering Hb to the food vacuole hold ambiguity. Based on  
86 immuno-electron microscopy, *PfHDP* was shown to be present in the vesicles that traffic Hb  
87 from the erythrocyte to the food vacuole of the parasite (Jani, Nagarkatti et al. 2008). *PfHDP*  
88 lacks a classical N-terminal signal sequence or PEXEL motif, which usually assists in the  
89 sorting and transporting of any protein to a destined site using the translocon complex. The  
90 translocon complex consisting of PTEX150, Exportin 2, PTEX88, HSP101 and Trx2 is used  
91 by the parasite to export proteins from the parasite to the erythrocyte cytoplasm (de Koning-  
92 Ward, Gilson et al. 2009).. Interaction of *PfHDP* and Hb paved the way for a hypothesis  
93 suggesting that *PfHDP* might be playing some role in the uptake of Hb from the erythrocyte  
94 cytoplasm (Gupta, Mehrotra et al. 2017).

95 In this study, we attempt to unravel one of the pathways involved in the uptake of Hb from  
96 the erythrocyte cytosol. Downregulation of *PfHDP* in the *PfHDP*-HAGlmS transgenic  
97 parasites led the parasites to take up less Hb from the erythrocyte and induced parasite stress.  
98 Immunoprecipitation of parasite cell lysates using anti-Hb and anti- GFP antibodies showed  
99 an association of *PfHDP* with Hb and with the components of the translocon complex, such  
100 as exportin-2, PTEX150 and HSP101. *In silico and in vitro* protein-protein interaction studies  
101 confirmed the association of *PfHDP* with *Pfexp-2*. Hence, we propose that *PfHDP*  
102 participates in the uptake of Hb from erythrocyte using the translocon complex. Functional  
103 insights into the role of *PfHDP* can help us design better inhibitors targeting both the heme  
104 and Hb binding *PfHDP* domains.

## 105 **Methods**

### 106 **Maintenance of *P. falciparum* cultures and transfection**

107 The *P. falciparum* parasite line 3D7 was maintained as described previously (Trager and  
108 Jensen 1976). To generate a GFP overexpressing transfection vector construct, the entire  
109 open reading frame of *PfHDP* was amplified using HDPGFP-FP  
110 5'GCAGATCTTTTTTCATCAGTATGAAAAAT AGATTTTATTAT 3' and HDPGFP-  
111 RP 5'GC CCTAGGAAAAATGATGGGCTTATCTACTATAT3' primer set and cloned into  
112 the pSSPF2 vector to create a C terminal *PfHDP*-GFP fusion protein under the control  
113 of *hsp86* promoter. *P. falciparum* 3D7 ring-stage parasites were transfected with 100µg of  
114 plasmid DNA by electroporation (310 V, 950 µF) and the transfected parasites were selected  
115 using 2.5 nM blasticidin (Crabb, Rug et al. 2004). Expression of the *PfHDP*-GFP fusion

116 protein in transgenic *P. falciparum* blood-stage parasites was examined by western blotting  
117 and immunofluorescence. Protein bands were visualized using an ECL kit (Thermo  
118 Scientific, USA).

119 For transfection of knock-down constructs, C-terminal region of *PfHDP* was amplified using  
120 gene-specific primers, HDP GlmSHA FP  
121 5'GCAGATCTTTGAACATAAGCCTGTAAAAAGGA C 3' and HDP GlmSHA RP 5'  
122 GCCTGCAGAAA AATGATGGGCTTATCTACTAT3' and cloned into the transfection  
123 vector pHA-glmS using *PstI* and *BglII* restriction sites to create a fusion of desired gene of  
124 interest (GOI) with HA-glmS at the 3' UTR under the control of native promoter. The ring-  
125 stage parasites were transfected as mentioned and transgenic parasites were selected on  
126 alternate WR22910 drug ON and OFF cycles to ensure genomic integration of *PfGOI-HA-*  
127 *glmS* constructs. The transgenic parasites were then subjected to clonal selection by serial  
128 dilution to obtain parasite line from a single genome integrated clone. The integration was  
129 checked by PCR amplification of genomic fragments using different sets of primers: (1) (a/b)  
130 HDP GlmSHA FP/ HDP GlmSHA RP (2) (c/d) HDPint check 5'  
131 GTAGAATGTATTTTTCATCAGT3'/ HAintcheck 5'TACGGATACGCATAATCGG3'.

### 132 **Cloning, Recombinant Expression, and Purification of exportin 2 protein**

133 The forward and reverse primers used for the cloning of C-terminal *Plasmodium falciparum*  
134 exportin 2 (*Pfexp-2*) were, 5' CCCCATGGGATCCATGAACAATTAAGATATTTA 3'  
135 and 5' GCGCGGCCGCTTCTTTATTTTCATCTTTTTT 3', respectively. The PCR product  
136 of these primers was cloned into a pJET vector and subsequently subcloned into a pET28b  
137 vector. The gene cloned in the pET-28b vector was expressed in codon+ *Escherichia coli*  
138 cells and protein localized to inclusion bodies, which were isolated as described. Briefly, the  
139 inclusion bodies were solubilized in an 8 M urea buffer (500 mM Tris, 150 mM NaCl). The  
140 suspension was incubated for 1 h at room temperature (RT) and then centrifuged at 12,000  
141 × g for 30 min at RT. The supernatant containing solubilized protein was kept for binding  
142 with Ni-NTA<sup>+</sup> resin overnight at RT with constant shaking. After binding, the suspension  
143 was packed in a purification column, and flow-through was collected. The resin was washed  
144 with an 8 M urea buffer containing 10 mM imidazole. Bound protein(s) was eluted in an 8 M  
145 urea buffer containing different concentrations of imidazole. Eluted protein fractions were  
146 analyzed by 12% SDS-PAGE. The eluted fractions containing the purified protein, were  
147 pooled and concentrated. The refolding method was adopted from a standard universal  
148 protocol (Tsumoto, Ejima et al. 2003). The protein was refolded gradually by decreasing the

149 urea concentration (6M, 4M, 2M, 1M, 0M) in the refolding buffer (0.05 M Tris, pH 8, 1 mM  
150 EDTA, 0.5 M arginine, 0.4 mM Triton X-100, 1 mM reduced glutathione, 0.5 mM oxidized  
151 glutathione). The refolded proteins were concentrated and dialyzed against 0.05 M Tris, pH  
152 8, and 0.15 M NaCl and stored at  $-80^{\circ}\text{C}$ . The purified protein was analyzed on a 12% SDS  
153 polyacrylamide gel followed by western blotting with anti His HRP antibody.

#### 154 **Generation of antibodies against recombinant *PfHDP* and *Pfexp-2***

155 Antibodies against recombinant *PfHDP* and *Pfexp-2* were raised in mice and rabbit. For this  
156 5-6-week-old female BALB/c mice were immunized with 25  $\mu\text{g}$  of recombinant HDP protein  
157 emulsified in Freund's complete adjuvant on day 0 followed by three boosts of proteins  
158 emulsified with Freund's incomplete adjuvant on days 14, 28 and 42. The animals were bled  
159 for serum collection on day 49. In case of rabbits, NewZealand white female rabbits were  
160 immunized with 200 $\mu\text{g}$  of recombinant *PfHDP* and *Pfexp-2*, respectively, emulsified in  
161 Freund's complete adjuvant on day 0 followed by three boosts emulsified with Freund's  
162 incomplete adjuvant on days 21, 42 and 63. The animals were bled for serum collection on  
163 day 70. The antibody titer in serum samples were quantified by enzyme-linked  
164 immunosorbent assay (ELISA).

#### 165 ***In vitro* protein-protein interaction analysis**

166 ELISA based protein-protein interaction analysis was performed as described previously  
167 (Paul, Deshmukh et al. 2017). Briefly, a 96-well microtiter plate was coated overnight at  $4^{\circ}\text{C}$   
168 with 50 ng recombinant *PfHDP* protein. Another unrelated *Plasmodium falciparum*  
169 recombinant protein, Ddi was coated as negative control. After blocking the wells with 5%  
170 milk in PBS for 2h, recombinant *Pfexp-2* was added in different amounts ranging from 0 to  
171 100ng, and the plate incubated for 3 h at  $37^{\circ}\text{C}$ . The interaction was detected using antibodies  
172 against exportin 2 (1:500). Incubation with HRP conjugated anti-rabbit antibodies (1:3000)  
173 was done for 1h and quantified after adding the substrate OPD by measuring the resulting  
174 absorbance at 490 nm.

175 Far western assays were performed according to the protocol described earlier (Wu, Li et al.  
176 2007). Briefly 1-5  $\mu\text{g}$  of recombinant *PfHDP* and an unrelated *Plasmodium* protein  
177 *PfMLH/MBP* were separated by SDS-PAGE and transferred to a nitrocellulose membrane.  
178 The proteins were first denatured and then renatured on the membrane itself. The membranes  
179 were blocked with 5% skimmed milk and incubated with 2  $\mu\text{g}/\text{mL}$  of purified interacting bait

180 proteins i.e, Hb and exp 2 in protein binding buffer (100 mM NaCl, 20 mM Tris (pH 7.6), 0.5  
181 mM EDTA, 10% glycerol, and 1 mM DTT) for 2h at room temp. After washing the non-  
182 specific proteins, membranes were incubated with rabbit anti- Hb/ anti-exp-2 followed by  
183 incubation with HRP conjugated anti-rabbit antibodies (1:100000) for 1h at RT. Finally,  
184 membranes were imaged with a Biorad ECL chemidoc.

185 For *in vitro* co-immunoprecipitation, 1µg of each protein *Pf*HDP and Hb were incubated  
186 together at room temperature for 2h in a reaction volume of 100µL containing 1× binding  
187 buffer (50 mM phosphate buffer at pH 7.0, 75 mM NaCl, 2.5 mM EDTA at pH 8.0, and 5  
188 mM MgCl<sub>2</sub>), 0.1% Nonidet P 40, and 10 mM DTT. The reaction mix was incubated for 2h at  
189 4°C with 20µL of pre-equilibrated Protein A/G conjugated antibody beads. The beads were  
190 centrifuged at 1,000× g for 5 min, washed with 200µL of binding buffer containing 400 mM  
191 NaCl, boiled for 5 min in SDS/PAGE reducing loading buffer, electrophoresed,  
192 immunoblotted, and probed. Protein A/G beads conjugated to preimmune sera were used as a  
193 negative control.

194 The Surface Plasmon Resonance analysis was carried out on the Biacore T200 instrument  
195 (GE Healthcare). Over 9500 Response Units of the *recombinant* HDP protein were  
196 immobilized on S-Series CM5 sensor chip (GE Healthcare) using 10mM sodium acetate  
197 pH4.0 solution (GE Healthcare). The surface of the sensor chip was blocked with 1M  
198 ethanolamine-HCl pH8.5 (GE Healthcare). Recombinant *Pf*exp-2/Hb at increasing  
199 concentrations was injected over the immobilized HDP and on the reference flow cell at a  
200 flow rate of 20 µl min<sup>-1</sup>. The kinetic parameters of the interaction and binding responses in  
201 the steady-state region of the sensogram were analyzed using Biacore evaluation software,  
202 version 4.1.1 (GE Healthcare).

### 203 **Indirect immunofluorescence assay**

204 Briefly, thin smears of parasite cultures were made on a glass slide and fixed with a mixture  
205 of methanol/acetone. Slides were blocked in blocking buffer (PBS, 3% BSA) for 2h at 37 °C.  
206 Immunostaining was performed using primary antibodies (anti-*Pf*HDP antibody 1:100, anti-  
207 Hb antibody 1:100, anti-*Pf*exp-2 antibody 1:50, anti-*Pf*PTEX150 antibody 1:50) and  
208 appropriate secondary antibody Alexa flour 594 goat anti-mice (1:500) and Alexa flour 488  
209 goat anti-rabbit (1:500). For liquid staining the parasite samples were fixed in 4%  
210 paraformaldehyde/ glutaraldehyde. The fixed samples were permeabilized using 0.1% triton



211 X100. The cells were blocked in 10% FBS for 2h at RT. Immunostaining was then performed  
212 using primary antibodies overnight at 4°C. Appropriate secondary antibody, Alexa flour 594  
213 goat anti-mice (1:500) and Alexa flour 488 goat anti-rabbit (1:500) was then added to stain  
214 the parasites for 1h at RT. The nucleus of the parasites was stained using DAPI. For imaging,  
215 a drop of the suspension was taken on a slide and viewed under the microscope.

216 The transgenic parasite suspension was incubated with DAPI (2 ng/ml) in PBS at RT for  
217 10 min and parasites were observed under a microscope to visualize the GFP expression. The  
218 images were captured using a Nikon A1 Confocal Microscope and exported as 8-bit RGB  
219 files. Images were analyzed using Nikon NIS Elements v 4.0 software. Imaris image was  
220 created using the software IMARIS v 4.

### 221 **Immunoprecipitation reaction**

222 Immunoprecipitation experiments were performed using the Pierce Crosslink  
223 Immunoprecipitation Kit (Product #26147). Briefly, synchronized *Plasmodium falciparum*  
224 3D7 mid-late trophozoites were enriched from the uninfected population using density-based  
225 percoll treatment. The parasite pellet obtained was treated with Streptolysin O to lyse the  
226 erythrocyte membrane. The pellet containing the parasite surrounded by the parasitophorous  
227 vacuolar membrane was washed with PBS until lysis of RBC stopped by centrifugation at  
228 15000×g for 1 min and the pellet was then resuspended in PBS. The parasite pellet was then  
229 lysed using the RIPA buffer (250mM Tris, 150mM NaCl, 1mM EDTA, 1% NP-40, 5%  
230 glycerol: pH 7.4) containing protease and phosphatase inhibitor cocktails (Roche) for 30 min  
231 at 4°C with intermittent mixing. Lysate was clarified by centrifugation at 15000×g for 30  
232 min. The supernatant protein concentration was determined by the BCA Protein estimation  
233 assay kit (Pierce) using BSA standards as reference. Approximately 1mg of total protein was  
234 incubated with about 10µg of anti- Hb antibody, cross-linked to 10µl of Protein A agarose  
235 beads using disuccinimidyl suberate (DSS) as crosslinker, for 12h at 4°C with constant  
236 mixing. An equal amount of protein was allowed to bind to beads conjugated to the  
237 preimmune antibody as a control. Following binding, beads were washed with the wash  
238 Buffer and the bound proteins were eluted from the beads using the Elution Buffer (Tris-  
239 Glycine pH 2.8). Proteins in the immunoprecipitated samples were digested by in-solution  
240 trypsin digestion. Samples were brought to a final volume of 100µl in 50mM Ammonium  
241 Bicarbonate (Sigma, U.S.A.) buffer to adjust the pH to 7.8, reduced with 10mM DTT for 1h  
242 at RT followed by alkylation with 40 mM Iodoacetamide (Sigma, U.S.A.) for 1h at RT under



243 dark conditions. Proteins were digested by the addition of Promega sequencing grade  
244 modified trypsin (V511A) at a ratio 1:50 (w/w) of trypsin: protein. For complete digestion,  
245 samples were placed in a water-bath at 37°C for 16h. After digestion, extracted peptides were  
246 acidified with 0.1% formic Acid and analyzed by mass spectrometry.

247 The SLO-treated trophozoite stage lysate of *Pf*HDP-GFP transgenic parasites was  
248 immunoprecipitated using GFP-Trap<sup>®</sup>\_A Kit (Chromotek)/ anti-GFP antibody following the  
249 manufacturer's instructions. GFP-Trap<sup>®</sup>\_A beads/ anti-GFP antibody was allowed to bind to  
250 parasite lysate by tumbling the tube end-over-end. Proteins were eluted in a 50µl elution  
251 buffer, digested with trypsin and peptides were analysed by mass spectrometry. 3D7 parasites  
252 treated using the same protocol was used as negative control.

### 253 **Conditional knock down assay**

254 The functional role of *Pf*HDP was determined by knocking down the HDP mRNA with  
255 glucosamine. Effect of knock down on parasite invasion was evaluated with 3D7 strain of *P.*  
256 *falciparum* as the control. The parasite lines (*Pf*HDP-HA-GlmS transgenic and 3D7) were  
257 synchronized using 5% sorbitol and the growth assay was set at the mid ring stage with a  
258 haematocrit and parasitemia of synchronized ring stage culture adjusted to 2% and 1%,  
259 respectively. Glucosamine was added to the parasite culture at varying concentrations (0,  
260 1.25mM, 2.5mM, and 5mM). Parasite growth was monitored microscopically by Giemsa-  
261 stained smears. The parasitemia was estimated after an incubation of 40h in the next cycle  
262 and also in the second cycle using flow cytometry. Briefly, cells from samples were pelleted  
263 and washed with PBS followed by staining with ethidium bromide (10µg/ml) for 20min at  
264 37°C in the dark. The cells were subsequently washed twice with PBS and analyzed on  
265 FACS calibur (Becton Dickinson) using the Cell Quest software. Fluorescence signal (FL2)  
266 was detected with the 590nm band pass filter using an excitation laser of 488nm collecting  
267 100000 cells per sample. Uninfected RBCs stained in similar manner were used as control.  
268 Following acquisition, data were analyzed for percentage parasitemia of each sample by  
269 determining the proportion of FL2-positive cells using Cell Quest.

### 270 **Protein-protein docking analysis**

271 PlasmoDB release (release 48) was used to retrieve sequences of *Pf*exp-2 and *Pf*HDP  
272 proteins (Bahl, Brunk et al. 2002). The predicted 3D model of *Pf*HDP was used as reported  
273 previously (Gupta, Mehrotra et al. 2017). The cryo-EM structure of *Pf*exp-2 has been

274 resolved (Ho, Beck et al. 2018), hence its corresponding PDB structure (6E10.pdb) was  
275 retrieved from the RCSB PDB. The protein-protein docking was performed using PatchDock  
276 based on shape complementarity principles (Schneidman-Duhovny, Inbar et al. 2005).  
277 Energy refinement was performed for top 100 docked conformations using FireDock  
278 (Mashiach, Schneidman-Duhovny et al. 2008). Different conformations showing global  
279 energy  $\leq -5.0$  kcal/mol for *Pfexp-2-PfHDP* complexes were further analysed. PyMol was  
280 used to visualize protein complexes and generate images (<https://pymol.org/2/>). DIMPLOT  
281 was used to retrieve and visualize residues within 4Å of interacting docked *Pfexp- 2-PfHDP*  
282 complexes (Laskowski and Swindells 2011). Protein Interactions Calculator (PIC) was used  
283 to identify *Pfexp-2-PfHDP* interactions which recognizes various kinds of interactions, such  
284 as disulphide bonds, hydrophobic interactions, ionic interactions, hydrogen bonds, aromatic-  
285 aromatic interactions, aromatic-sulphur interactions, and cation –  $\pi$  interactions within a  
286 protein or between proteins in a complex (Tina, Bhadra et al. 2007).

287

288

## 289 **Results**

### 290 ***PfHDP* interacts with Hb as well with the members of *Plasmodium* translocon complex**

291 To identify the protein(s) associated with *PfHDP*, we generated a parasite line expressing C-  
292 terminal GFP-tagged HDP in *Plasmodium falciparum*. *PfHDP*-GFP was expressed in an  
293 episomal construct; pSSPF2 vector (Sup Fig. 1A-D) with GFP tag at 3' end under the control  
294 of HSP86 promoter. Western blot analysis using anti- GFP antibodies recognised two bands  
295 in *PfHDP*-GFP in transgenic parasite lysates, one corresponding to *PfHDP*-GFP ~50kDa and  
296 the other at ~25kDa. The lower band could be a result of processing of HDP-GFP in the  
297 lysate samples (Sup Fig. 1E). Indirect immunofluorescence assay of transgenic *PfHDP*-GFP  
298 asexual blood stages showed that *PfHDP* is localized in the vesicles transported to the food  
299 vacuole (Fig. 1A). Co-staining of these transgenic parasites with BODIPY ceramide stain  
300 followed by live cell imaging revealed that *PfHDP*-GFP vesicles are present at the  
301 parasitophorous vacuole membrane as well as near the food vacuole indicating that *PfHDP* is  
302 trafficked to the food vacuole as well as to the erythrocyte cytoplasm (Fig. 1B). To ascertain  
303 whether *PfHDP*-GFP was trafficked to the erythrocyte cytosol, we fractionated the transgenic  
304 parasites using streptolysin O to separate the parasite and erythrocyte cytoplasm fractions.  
305 Western blot analysis of both fractions using anti-GFP antiserum recognized bands at

306 ~50kDa and ~25kDa in parasite cytoplasm and a band at ~25kDa in erythrocyte cytoplasm  
307 (Sup Fig. 1F). Together, these results demonstrated that *PfHDP*-GFP was trafficked to the  
308 erythrocyte cytosol besides being transported to the food vacuole for the hemozoin formation.  
309 Western blot analysis of Streptolysin O treated fractions of infected erythrocytes and  
310 immunofluorescence assays using anti-*PfHDP* antibodies further validated that *PfHDP* is  
311 present both inside the parasite as well as in the erythrocyte cytoplasm (Sup Fig. 2A-B).

312 We next examined the *PfHDP*-GFP interactome in the *PfHDP*-GFP parasite line using a GFP  
313 pull-down assay. Briefly, *PfHDP*-GFP protein was pulled down from cell lysates together  
314 with interacting partners, if any, using GFP-Trap beads bound with GFP antisera. Bound and  
315 eluted proteins were digested with trypsin and the released peptides were analysed by mass  
316 spectrometry to identify the interacting partners. In addition to the food vacuole proteases like  
317 Plasmepsin and falcipain 2, which are already shown to be a part of hemozoin formation  
318 complex (Chugh, Sundararaman et al. 2013), we found several proteins in the pull-down  
319 results including Hb as an interacting protein of *PfHDP*. Additionally, members of the  
320 translocon complex including *Pfexp-2*, PTEX150, PTEX88 were identified in the  
321 immunoprecipitants (Table1). None of these proteins were pulled down from the lysates of *P.*  
322 *falciparum* 3D7, which served as a negative control. Together, these results suggested an  
323 association of *PfHDP* with Hb as well as with the components of the translocon complex. To  
324 confirm the involvement of translocon complex in the trafficking of *PfHDP*-Hb complex  
325 inside the infected asexual blood stage parasites, immunoprecipitation of Streptolysin O  
326 clarified trophozoite stage parasite extract was performed using anti-human Hb antibody with  
327 3D7 lysate and immunoprecipitate was subjected to mass spectrometric analysis. *PfHDP*  
328 protein was identified as an interacting partner of Hb inside the parasite along with *Exp-2*,  
329 PTEX150, PTEX88, HSP101 and Trx2 proteins (Table 2). None of these proteins were  
330 detected in the immunoprecipitate with pre-immune serum.

331 To provide further evidence(s) for the association between Hb and *PfHDP*, co-localization  
332 and *in vitro* protein-protein interaction studies such as co-immunoprecipitation and far-  
333 western analysis were performed. For the far-western analysis, recombinant HDP protein that  
334 served as a bait was resolved on the SDS-PAGE gel and Hb was allowed to interact with bait  
335 protein on the nitrocellulose membrane, bound protein was probed with anti-Hb antibody. A  
336 high affinity interaction between *PfHDP* and Hb was observed (Sup Fig. 3A). Secondly, we  
337 performed interaction studies between *PfHDP* and Hb and co-immunoprecipitation analysis  
338 was carried out using anti- HDP antiserum. As seen in Sup Fig. 3B, anti-HDP antisera could

339 pull down Hb from a mixture of the two proteins as analyzed by western blot analysis using  
340 anti-human Hb antibody. Recombinant ClpQ protein, a mitochondrial protein, was used as a  
341 negative control. Immunolocalization studies were next performed to localize *PfHDP* and  
342 human Hb protein together in trophozoite stage parasites using anti-*PfHDP* and anti-Hb  
343 antibodies. *PfHDP* co-localized considerably with human Hb with a Pearson coefficient of  
344 0.81, both inside the parasite as well as in the erythrocyte cytosol (Fig. 1C). We further  
345 analysed the kinetics of the binding of *PfHDP* to Hb using the Surface Plasmon Resonance.  
346 The recombinant HDP protein was immobilized on a CM5 SPR chip and Hb was allowed to  
347 interact with the immobilized protein at different concentrations ranging from 31.125µg/ml to  
348 500µg/ml. The sensogram showed a dose dependent increase in binding of the Hb with time  
349 to the immobilized *PfHDP* protein with an equilibrium dissociation constant of  $4.3 \times 10^{-6}$  M  
350 (Fig. 1D). The binding followed a two-state reaction suggesting more than one binding site  
351 for binding of *PfHDP* to Hb.

352 To validate the involvement of components of translocon complex in Hb/*PfHDP* trafficking if  
353 any, co-localization studies were performed by immune-staining trophozoite stage parasites  
354 with the respective antibodies. Immunofluorescence assay showed that *PfHDP* and Hb indeed  
355 co-localized with the two components of the translocon complex: *Pfexp-2* and *PfPTEX150*,  
356 at the parasitophorous vacuolar membrane (Fig. 2A-B and 3A). The Pearson coefficient of  
357 the correlation was found to be above ~0.6. Together these results point towards a likely role  
358 of the translocon complex in the transport of *PfHDP*-Hb complex from erythrocyte cytoplasm  
359 into the parasite.

### 360 ***PfHDP* interacts with exportin 2 at the parasitophorous vacuolar membrane**

361 We next sought to analyse the interaction of *PfHDP* with one of the members of the  
362 translocon complex; *Pfexp-2* that has been suggested to be a pore forming protein on the  
363 parasitophorous vacuolar membrane (Garten, Nasamu et al. 2018, Sanders, Dickerman et al.  
364 2019). To study the interaction between *PfHDP* and *Pfexp-2*, we cloned and expressed a C-  
365 terminal fragment of *Pfexp-2* encompassing amino acids 139-285 in *E. coli* (Sup Fig. 4A).  
366 The protein was purified to homogeneity using the Ni-NTA<sup>+</sup> column. The purified protein  
367 migrated at a molecular size of ~20kDa as seen in Coomassie stained SDS-PAGE and  
368 western blot experiment performed using anti-His-HRP antibody (Sup Fig. 4B-C). Specific  
369 antibodies were generated against recombinant *Pfexp-2* protein in rabbit. The antisera

370 recognized a band of ~33kDa in the 3D7 parasite cell lysate, which corresponds to the  
371 monomeric form of native *Pfexp-2* (Sup Fig. 4D).

372 We further employed *in vitro* protein- protein interaction tools such as *in vitro* ELISA based  
373 protein binding assay and far-western binding analysis to assess *PfHDP* interaction with  
374 *Pfexp-2*. Recombinant *PfHDP* protein interacted with *Pfexp-2* in a concentration dependent  
375 manner in (Sup Fig. 4E). A nonspecific recombinant *PfDdi* protein was used as a negative  
376 control, which showed no significant interaction with *Pfexp-2*. For the far-western binding  
377 analysis we used recombinant *PfHDP* protein as a bait and *Pfexp-2* was allowed to interact  
378 with bait protein on the nitrocellulose membrane and probed with anti-*exp-2* antibody. A  
379 nonspecific purified MBP protein was used as a negative control. As evident in Fig. 3B,  
380 *PfHDP* interacts specifically with *Pfexp-2* (Fig. 3B). To know whether *PfHDP* interacts with  
381 *Pfexp-2* in the cell, parasite lysate from *PfHDP*-GFP transgenic line was immunoprecipitated  
382 using GFP-TRAP column and elutes from the GFP pull down assay were analysed by  
383 western blot analysis using anti-*Pfexp-2* antibody. The parasite lysate from 3D7 parasite line  
384 was used as a negative control. As seen in Supplementary figure 4F, *PfHDP*-GFP fusion  
385 protein interacted with *Pfexp-2*, which was detected in the western blot analysis, whereas  
386 3D7 lysate did not show any *Pfexp-2* band. To study the kinetics of the binding of *PfHDP* to  
387 *Pfexp-2*, we performed the Surface Plasmon Resonance analysis by immobilizing the  
388 recombinant HDP protein on a CM5 chip using EDC-NHS coupling. Recombinant *Pfexp-2*  
389 was allowed to interact with the immobilized protein at different concentrations ranging from  
390 0.625  $\mu$ M to 10  $\mu$ M. The sensogram showed a dose dependent increase in binding of the  
391 *Pfexp-2* with time to the immobilized *PfHDP*, with an equilibrium dissociation constant of  
392  $1.1 * 10^{-6}$  M (Fig. 3C). Together, these binding studies unequivocally suggested an interaction  
393 between *PfHDP* and *Pfexp-2*.

394 To identify the interaction sites for the *Pfexp-2* and *PfHDP*, we carried out *in silico*  
395 interaction analysis using the already known structure of the malaria translocon complex,  
396 6E10.pdb and HDP structure model. *In silico* docking analysis of *Pfexp-2* monomer with  
397 *PfHDP* using PatchDock and energy refinement on top 100 conformations were carried out  
398 using default parameters. Next, the docked conformations, with global binding energy better  
399 than -5 kcal/mol were analyzed. Interestingly, the docking analysis showed that *PfHDP* binds  
400 to the multiple sites of *Pfexp-2*, which includes Linker helix (L), globular domain body (B)  
401 and transmembrane domain (T) of *Pfexp-2* (Fig. 3D) with highest binding energy observed  
402 for *PfHDP*-*Pfexp-2* in the Linker region (-39.57 kcal/mol, pose 1). Similarly, the best binding

403 score observed for *Pf*HDP binding to the globular domain body (B) and transmembrane  
404 domain (T) of *Pfexp-2* was -17.08 (pose 2) and -6.35 kcal/mol (pose 3), respectively. The PPI  
405 analysis showed gradual changes in the *Pf*HDP residues, which interacts with different  
406 pockets of *Pfexp-2* (Supplementary Table 1) however *Pf*HDP TYR56 and ASN59 residues  
407 binding remain consistent and were present within 4Å of *Pfexp-2* in almost all conformations  
408 analyzed for *Pfexp-2-Pf*HDP complexes (Sup Fig. 5). Thus, our bioinformatics analysis  
409 further supported an interaction between *Pfexp-2* and *Pf*HDP.

#### 410 **Knockdown of *Pf*HDP results in parasite stress and low levels of Hb inside the parasite**

411 To illustrate the functional importance of *Pf*HDP protein in parasite biology in particularly  
412 for Hb import at asexual blood stages, a transgenic line with the genomic locus of *Pf*HDP  
413 fused to GlmS ribozyme system was generated. The GlmS ribozyme is transcribed along with  
414 the gene. This inducible knockdown system uses glucosamine as an inducer. In the presence  
415 of glucosamine, which binds to ribozyme inducing the cleavage of the chimeric mRNA and  
416 hence knocking-down the respective targets (Sup Fig. 6A). The transgenic line was generated  
417 using pHA-GlmS vector-based constructs (Sup Fig. 6B-C). The integrants were selected  
418 using WR22910 selection, followed by clonal selection by limited dilution to obtain a pure  
419 conditional knockdown parasite line. The integration was confirmed by PCR amplification  
420 using different combinations of primer sets (Sup Fig. 6D). Expression of the HA tagged  
421 fusion protein and the native protein were confirmed by western blot analysis of the  
422 transgenic parasites using anti-HA antibody, which detected a single band at ~50kDa,  
423 corresponding to the size of dimeric native protein in the parasite (Sup Fig. 6E). No such  
424 band was detected in 3D7 parasite lysate was used as a negative control

425 To study the effect of the knockdown on the expression of *Pf*HDP protein, the late  
426 trophozoite stages of transgenic parasites were treated with different concentrations of GlcN  
427 (0mM, 1.25mM, 2.5mM, respectively). The parasites were harvested in the next cycle at 42-  
428 44 hpi and saponin treated parasites were lysed in RIPA buffer. Expression of the fusion  
429 protein was analysed by western blot analysis of the lysates from transgenic parasites using  
430 anti-HA antibody. A considerable reduction in *Pf*HDP protein was seen in the presence of  
431 different concentrations of GlcN (Fig. 4A). *Pf*BiP, a constitutively expressed endoplasmic  
432 reticulum chaperone protein, was used as a loading control. We next studied the effect of the  
433 knockdown of this protein on the growth of the parasites. GlcN was added at the ring stage  
434 parasites 16-20 hpi at varying concentrations (0 mM, 1.25 mM, 2.5 mM) and the growth was



435 monitored till the formation of new rings up till two invasion cycles. In the first cycle, a slight  
436 decrease in the parasitemia was observed at 2.5mM GlcN concentration. However, when the  
437 parasites were allowed to progress to the second cycle, growth inhibition of ~40% was  
438 observed in *PfHDP-HAGlmS* knockdown parasites (Fig. 4B). The inability of GlcN to inhibit  
439 more than 50% parasite growth could be attributed to the incomplete knockdown of the  
440 protein in the first cycle, as the synthesis of *PfHDP* begins as early as the ring stages of the  
441 parasite. Giemsa smears in the second cycle of growth demonstrated an induction of parasite  
442 stress and food vacuole abnormalities (Fig. 4C). The 3D7 parasites treated similarly with  
443 varied GlcN concentrations were used as a negative control. We further analysed the Hb  
444 levels in the knockdown parasites by western blotting using anti-Hb antibody. A considerable  
445 decrease in the amounts of Hb was seen inside the GlcN treated parasites (Fig. 4A). *PfBiP*  
446 was used as a loading control and it did not show any change in expression. We next studied  
447 the expression/localization of *PfHDP* and Plasmeprin 2 in the *PfHDP* knock-down parasites.  
448 Interestingly, we observed an inappropriate expression for Plasmeprin 2, a food vacuole  
449 protease in these stressed parasites (Fig. 4D). Overall, these results demonstrated a role of  
450 *PfHDP* in Hb uptake and its impact on Hz formation.

#### 451 **Parasites expressing low levels of *PfHSP101* protein display low levels of Hb inside the** 452 **parasite**

453 To characterize the role of components of the translocon complex in Hb trafficking, in  
454 particular the Hb import, we next studied the uptake of Hb in *PfHSP101-DDDHA* (Beck,  
455 Muralidharan et al. 2014) knockdown lines. For the same, the *PfHSP101-DDD-HA* parasites  
456 were grown in the presence of trimethoprim (TMP) (Fig. 5A); removal of TMP causes  
457 functional interference of *PfHSP101* protein, thereby leading to its knockdown (Beck,  
458 Muralidharan et al. 2014). Briefly, the late trophozoite stages of parasites were treated with  
459 different concentrations of TMP (0 $\mu$ M, 2.5 $\mu$ M, 5 $\mu$ M, respectively) and these untreated v/s  
460 treated parasites were harvested in the next cycle at 42-44 hpi. The saponin lysed parasites  
461 were subjected to lysis in RIPA buffer and Hb levels in the control v/s knockdown parasites  
462 were analysed by western blot analysis using anti-Hb antibody. A remarkable decrease in  
463 levels of Hb was observed in the TMP untreated parasites where *PfHSP101* protein had been  
464 reduced considerably in comparison to the TMP treated parasites (Fig. 5B). *PfBiP* was used  
465 as a loading control. Reduction in *PfHSP101* levels was confirmed in TMP untreated parasite  
466 lysates using anti- HA antibody to confirm the successful knockdown of HSP101 protein.



467 In summary, these results advocated a role for *PfHDP* in trafficking/transport of Hb into the  
468 parasite. Based on the subcellular localization of *PfHDP*, its interaction with the Hb and with  
469 *Pfexp-2*, and its effect on the uptake of Hb in knockdown parasites, we propose a model  
470 suggesting that *PfHDP* interacts with Hb in infected erythrocyte. The *PfHDP*-Hb complex is  
471 then taken into the parasitophorous vacuole through the translocon complex by the interaction  
472 of *PfHDP* with *Pfexp-2*. The *PfHDP*-Hb complex is subsequently taken up by the parasite  
473 and gets translocated to the food vacuole by vesicular trafficking.

## 474 **Discussion**

475 Hb uptake and its degradation are highly crucial processes for the growth of *P. falciparum*.  
476 The degradation of Hb results in the generation of amino acids that are utilized by the parasite  
477 for its protein synthesis. Heme generated as a by-product during the process of Hb catabolism  
478 is highly toxic for the survival of parasites. Heme Detoxification Protein has earlier been  
479 shown to be involved in the conversion of heme to an inert polymer hemozoin (Jani,  
480 Nagarkatti et al. 2008). In the present study, we aimed to understand Hb uptake/trafficking  
481 inside the infected parasites with a possible role of *PfHDP* and translocon complex in Hb  
482 inward trafficking.

483 It has been reported earlier that *PfHDP* is exported into the infected erythrocyte cytosol and  
484 takes a circuitous trafficking route to reach the food vacuole and catalyzes in Hz formation in  
485 the food vacuole (Jani, Nagarkatti et al. 2008). These authors further showed using anti-  
486 *PfHDP* antibody as well as C- or N-tagged C-Myc-HDP protein that the trafficking of *PfHDP*  
487 to the cytosol of RBCs does not occur via the classical secretory pathway and the inbound  
488 HDP protein(s) are trafficked via their cytosomal uptake and vesicular trafficking (Jani,  
489 Nagarkatti et al. 2008). However, questions that remain unanswered is that how *PfHDP* is  
490 exported/imported into the erythrocyte cytosol or imported into the parasite back? To gain  
491 insights into the mode of trafficking of *PfHDP* into the infected parasites from RBC cytosol,  
492 a C- terminal GFP fusion HDP overexpressing parasite line under the control of Hsp86  
493 promoter was generated. Confocal microscopy studies showed that the inbound *PfHDP*-GFP  
494 protein is trafficked via vesicular trafficking. SLO treatment on these transgenic parasites  
495 showed the expression of *PfHDP*-GFP fusion protein in the SLO soup suggesting that  
496 *PfHDP*-GFP protein is exported to PVM and to the erythrocyte cytoplasm. To further  
497 illustrate the import of *PfHDP*, immunoprecipitation analysis of *PfHDP*-GFP transgenic line  
498 or 3D7 line lysates with either GFP trap/anti GFP antibody or anti-Hb antibody were

499 performed. Both the immunoprecipitates showed the presence of *PfHDP* and Hb together  
500 along with the members of the translocon complex (de Koning-Ward, Gilson et al. 2009)  
501 such as *PfPTEX150*, *PfExp-2* and *PfHSP101*, thereby implicating the role of *PfHDP* and  
502 translocon complex in Hb trafficking. Earlier, we have shown that *PfHDP* binds both heme as  
503 well as Hb (Gupta, Mehrotra et al. 2017). Based on these observations, we propose a model  
504 depicting *PfHDP* as an adapter protein that interacts with Hb in the erythrocyte cytoplasm  
505 and helps in the intake of Hb via the translocon complex.

506 To shed more lights into the proposed model, we expressed a C-terminal fragment of *Pfexp-2*  
507 and raised specific antibodies against *Pfexp-2*. Additionally, an anti-peptide PTEX-150  
508 antibody was generated. Both, *PfHDP* or Hb colocalized well with either *Pfexp-2* or  
509 *PfPTEX150* at the parasitophorous vacuolar membrane with a pearson's coefficient of  $>0.5$ ,  
510 advocating a role for translocon complex in Hb import. A recent near atomic resolution  
511 cryoEM structure of endogenous translocon complex revealed that *Pfexp-2* and *PfPTEX150*  
512 intermingle to form a static, funnel shaped pseudo-sevenfold symmetric protein conducting  
513 channel spanning the vacuole membrane (Chi-Min Ho et al., 2018). To support further on the  
514 role of *PfHDP* protein in import of Hb from erythrocyte cytoplasm, interaction studies  
515 between *PfHDP* and Hb or *Pfexp-2* were performed by far western blot analysis or by  
516 Surface Plasma Resonance analysis. Recombinant HDP interacted with both Hb as well as  
517 *Pfexp-2* with considerable affinities, thereby suggesting that *PfHDP*-Hb complex formed in  
518 infected erythrocyte cytoplasm is translocated through the static funnel by binding to *Pfexp-*  
519 2. These results were also substantiated by docking studies between *PfHDP* and *Pfexp-2*

520 To study the functional relevance of *PfHDP* and components of translocon complex in  
521 parasite import of Hb, a *PfHDP*-HAGImS inducible knockdown transgenic line was  
522 generated, although our attempts to knockout *PfHDP* gene failed. Knock-down of HDP in the  
523 parasite line using the inducer glucosamine induced food vacuole abnormalities and parasite  
524 stress. Growth inhibition was observed in glucosamine treated parasites. A reduced level of  
525 *PfHDP* inside the transgenic lines also led to the reduction in the uptake of Hb from the  
526 parasite cytosol. These parasites also showed mis-localized or poorly expressed Plasmeprin 2  
527 protein, a part of the hemozoin formation complex. These knocked-down parasites appeared  
528 to be in stress. The food vacuole was not properly developed in the *PfHDP* knocked-down  
529 parasites and hence the parasites exhibited gross morphological deformities. Attempts to  
530 study the transport of Hb in *PfHSP101* DDDHA transgenic lines revealed that knockdown of

531 one of the components of translocon complex reduced the ability of parasites to take up Hb  
532 from the erythrocyte cytoplasm. Hence the translocon machinery appeared to be essential for  
533 the uptake of Hb from the erythrocyte.

534 In summary, here we characterized *PfHDP* for its role in Hb uptake in addition to its  
535 previously characterized function in heme degradation. To characterize the role of *PfHDP* in  
536 Hb transport, here we generated a *PfHDP*-GFP transgenic line. Immunoprecipitation of  
537 highly synchronized culture of trophozoites from *PfHDP*-GFP line using anti-GFP antibody  
538 followed by LC-MS/MS analysis showed the association of Hb and *PfHDP* with each other  
539 and with the members of translocon complex such as Exp-2, PTEX150, PTEX88, HSP101  
540 and Trx2, a complex known to export parasite proteins. *In silico* analysis and *in vitro* protein-  
541 protein interaction techniques confirmed the interaction of *PfHDP* with *Pfexp-2*. We further  
542 showed that *PfHDP* is highly crucial in maintaining food vacuole and parasite health as  
543 attempts to knockdown the protein induced parasite stress. Hb uptake is severely affected in  
544 these transgenic parasites. The study thus emphasizes on the dual roles of Heme  
545 Detoxification Protein in Hb uptake as well as in conversion of heme to hemozoin. Looking  
546 at the multiple roles of *PfHDP* in the parasite life cycle, *PfHDP* appears to be an important  
547 target for new antimalarial discovery.

#### 548 **Acknowledgement**

549 This work was financially supported by Department of Biotechnology, Government of India  
550 ([BT/PR5267/MED/15/87/2012](#) and flagship project; [BT/IC-06/003/91](#)) from the Department  
551 of Biotechnology, Govt. of India. PM is a recipient of the J C Bose Fellowship awarded by  
552 SERB, Govt. of India, and work is supported by the grant (DST/20/015). We thank Prof  
553 Daniel E. Goldberg for providing us the *PfHSP101* DDDHA transgenic parasites. We thank  
554 Dr Paul Gilson for critical review of the manuscript. We also thank the Rotary Blood Bank  
555 for providing human red blood cells for *Plasmodium* culture. P.G. was recipient of ICMR  
556 Cenetenary Post-Doctoral Fellowship, ICMR, Government of India. We thank Dr. Naresh  
557 Sahoo and Surabhi Dabral for their help in the SPR interaction experiments and confocal  
558 imaging, respectively. We thank the animal house facility for help with antibody generation  
559 in mice and rabbit.

#### 560 **Ethics statement**

561 The animal work performed in this study was approved by the Institutional Animals Ethics  
562 Committee of ICGEB (IAEC-ICGEB). Rotary blood bank provided human red blood cells.

563 **Author Contributions**

564 PM conceived the idea. PM and PG designed the experiments. PG performed literature  
565 analysis. PG, RP, VT, SP, IK, AP, RB and SM performed experiments. RP and DG  
566 performed bioinformatics analysis. AM, DG and PM supervised the study. PG, PM wrote the  
567 manuscript, and all authors read and approved the manuscript.

568

569

570 **References**

- 571 Ashong, J. O., I. P. Blench and D. C. Warhurst (1989). "The composition of haemozoin from  
572 *Plasmodium falciparum*." Transactions of the Royal Society of Tropical Medicine and  
573 Hygiene **83**(2): 167–172.
- 574 Bahl, A., B. Brunk, R. L. Coppel, J. Crabtree, S. J. Diskin, M. J. Fraunholz, G. R. Grant, D.  
575 Gupta, R. L. Huestis, J. C. Kissinger, P. Labo, L. Li, S. K. McWeeney, A. J. Milgram, D. S.  
576 Roos, J. Schug and C. J. Stoeckert, Jr. (2002). "PlasmoDB: the *Plasmodium* genome  
577 resource. An integrated database providing tools for accessing, analyzing and mapping  
578 expression and sequence data (both finished and unfinished)." Nucleic Acids Res **30**(1): 87-  
579 90.
- 580 Beck, J. R., V. Muralidharan, A. Oksman and D. E. Goldberg (2014). "PTEX component  
581 HSP101 mediates export of diverse malaria effectors into host erythrocytes." Nature  
582 **511**(7511): 592-595.
- 583 Chugh, M., V. Sundararaman, S. Kumar, V. S. Reddy, W. A. Siddiqui, K. D. Stuart and P.  
584 Malhotra (2013). "Protein complex directs hemoglobin-to-hemozoin formation in  
585 *Plasmodium falciparum*." Proc Natl Acad Sci U S A **110**(14): 5392-5397.
- 586 Crabb, B. S., M. Rug, T.-W. Gilberger, J. K. Thompson, T. Triglia, A. G. Maier and A. F.  
587 Cowman (2004). "Transfection of the human malaria parasite *Plasmodium falciparum*."  
588 Methods in molecular biology (Clifton, N.J.) **270**: 263–276.
- 589 Dalal, S. and M. Klembe (2007). "Roles for two aminopeptidases in vacuolar hemoglobin  
590 catabolism in *Plasmodium falciparum*." J Biol Chem **282**(49): 35978-35987.
- 591 de Koning-Ward, T. F., P. R. Gilson, J. A. Boddey, M. Rug, B. J. Smith, A. T. Papenfuss, P.  
592 R. Sanders, R. J. Lundie, A. G. Maier, A. F. Cowman and B. S. Crabb (2009). "A newly  
593 discovered protein export machine in malaria parasites." Nature **459**(7249): 945-949.
- 594 Egan, T. J. (2008). "Haemozoin formation." Molecular and biochemical parasitology **157**(2):  
595 127–136.
- 596 Egan, T. J., J. M. Combrinck, J. Egan, G. R. Hearne, H. M. Marques, S. Ntenti, B. T.  
597 Sewell, P. J. Smith, D. Taylor, D. A. van Schalkwyk and J. C. Walden (2002). "Fate of haem  
598 iron in the malaria parasite *Plasmodium falciparum*." The Biochemical journal **365**(Pt 2):  
599 343–347.
- 600 Elliott, D. A., M. T. McIntosh, H. D. Hosgood, 3rd, S. Chen, G. Zhang, P. Baevova and K. A.  
601 Joiner (2008). "Four distinct pathways of hemoglobin uptake in the malaria parasite  
602 *Plasmodium falciparum*." Proc Natl Acad Sci U S A **105**(7): 2463-2468.

603 Francis, S. E., R. Banerjee and D. E. Goldberg (1997). "Biosynthesis and maturation of the  
604 malaria aspartic hemoglobinases plasmepsins I and II." J Biol Chem **272**(23): 14961-14968.

605 Garten, M., A. S. Nasamu, J. C. Niles, J. Zimmerberg, D. E. Goldberg and J. R. Beck (2018).  
606 "EXP2 is a nutrient-permeable channel in the vacuolar membrane of Plasmodium and is  
607 essential for protein export via PTEX." Nat Microbiol **3**(10): 1090-1098.

608 Gupta, P., S. Mehrotra, A. Sharma, M. Chugh, R. Pandey, A. Kaushik, S. Khurana, N.  
609 Srivastava, T. Srivastava, A. Deshmukh, A. Panda, P. Aggarwal, N. S. Bhavesh, R. K.  
610 Bhatnagar, A. Mohammed, D. Gupta and P. Malhotra (2017). "Exploring Heme and  
611 Hemoglobin Binding Regions of Plasmodium Heme Detoxification Protein for New  
612 Antimalarial Discovery." J Med Chem **60**(20): 8298-8308.

613 Ho, C. M., J. R. Beck, M. Lai, Y. Cui, D. E. Goldberg, P. F. Egea and Z. H. Zhou (2018).  
614 "Malaria parasite translocon structure and mechanism of effector export." Nature **561**(7721):  
615 70-75.

616 Jani, D., R. Nagarkatti, W. Beatty, R. Angel, C. Slebodnick, J. Andersen, S. Kumar and D.  
617 Rathore (2008). "HDP-a novel heme detoxification protein from the malaria parasite." PLoS  
618 pathogens **4**(4): e1000053.

619 Laskowski, R. A. and M. B. Swindells (2011). "LigPlot+: multiple ligand-protein interaction  
620 diagrams for drug discovery." J Chem Inf Model **51**(10): 2778-2786.

621 Lazarus, M. D., T. G. Schneider and T. F. Taraschi (2008). "A new model for hemoglobin  
622 ingestion and transport by the human malaria parasite Plasmodium falciparum." J Cell Sci  
623 **121**(11): 1937-1949.

624 Liu, J., I. Y. Gluzman, M. E. Drew and D. E. Goldberg (2005). "The role of Plasmodium  
625 falciparum food vacuole plasmepsins." The Journal of biological chemistry **280**(2): 1432–  
626 1437.

627 Luker, K. E., S. E. Francis, I. Y. Gluzman and D. E. Goldberg (1996). "Kinetic analysis of  
628 plasmepsins I and II aspartic proteases of the Plasmodium falciparum digestive vacuole." Mol  
629 Biochem Parasitol **79**(1): 71-78.

630 Mashiach, E., D. Schneidman-Duhovny, N. Andrusier, R. Nussinov and H. J. Wolfson  
631 (2008). "FireDock: a web server for fast interaction refinement in molecular docking."  
632 Nucleic Acids Res **36**(Web Server issue): W229-232.

633 Organization, W. H. (2019). World malaria report 2019. Geneva, World Health Organization.

634 Paul, G., A. Deshmukh, I. Kaur, S. Rathore, S. Dabral, A. Panda, S. K. Singh, A. Mohammed,  
635 M. Theisen and P. Malhotra (2017). "A novel Pfs38 protein complex on the surface of  
636 Plasmodium falciparum blood-stage merozoites." Malaria Journal **16**(1).

- 637 Rathore, D., T. F. McCutchan, M. Sullivan and S. Kumar (2005). "Antimalarial drugs:  
638 current status and new developments." Expert opinion on investigational drugs **14**(7): 871–  
639 883.
- 640 Sanders, P. R., B. K. Dickerman, S. C. Charnaud, P. A. Ramsland, B. S. Crabb and P. R.  
641 Gilson (2019). "The N-terminus of EXP2 forms the membrane-associated pore of the protein  
642 exporting translocon PTEX in Plasmodium falciparum." J Biochem **165**(3): 239-248.
- 643 Schneidman-Duhovny, D., Y. Inbar, R. Nussinov and H. J. Wolfson (2005). "PatchDock and  
644 SymmDock: servers for rigid and symmetric docking." Nucleic Acids Res **33**(Web Server  
645 issue): W363-367.
- 646 Singh, N., P. S. Sijwali, K. C. Pandey and P. J. Rosenthal (2006). "Plasmodium falciparum:  
647 biochemical characterization of the cysteine protease falcipain-2'." Exp Parasitol **112**(3): 187–  
648 192.
- 649 Tina, K. G., R. Bhadra and N. Srinivasan (2007). "PIC: Protein Interactions Calculator."  
650 Nucleic Acids Res **35**(Web Server issue): W473-476.
- 651 Trager, W. and J. B. Jensen (1976). "Human malaria parasites in continuous culture." Science  
652 (New York, N.Y.) **193**(4254): 673–675.
- 653 Tsumoto, K., D. Ejima, I. Kumagai and T. Arakawa (2003). "Practical considerations in  
654 refolding proteins from inclusion bodies." Protein Expression and Purification **28**(1): 1–8.
- 655 Woodrow, C. J. and N. J. White (2017). "The clinical impact of artemisinin resistance in  
656 Southeast Asia and the potential for future spread." FEMS microbiology reviews **41**(1): 34–  
657 48.
- 658 Wu, Y., Q. Li and X.-Z. Chen (2007). "Detecting protein-protein interactions by Far western  
659 blotting." Nature protocols **2**(12): 3278–3284.

660

661



662 **Figures**

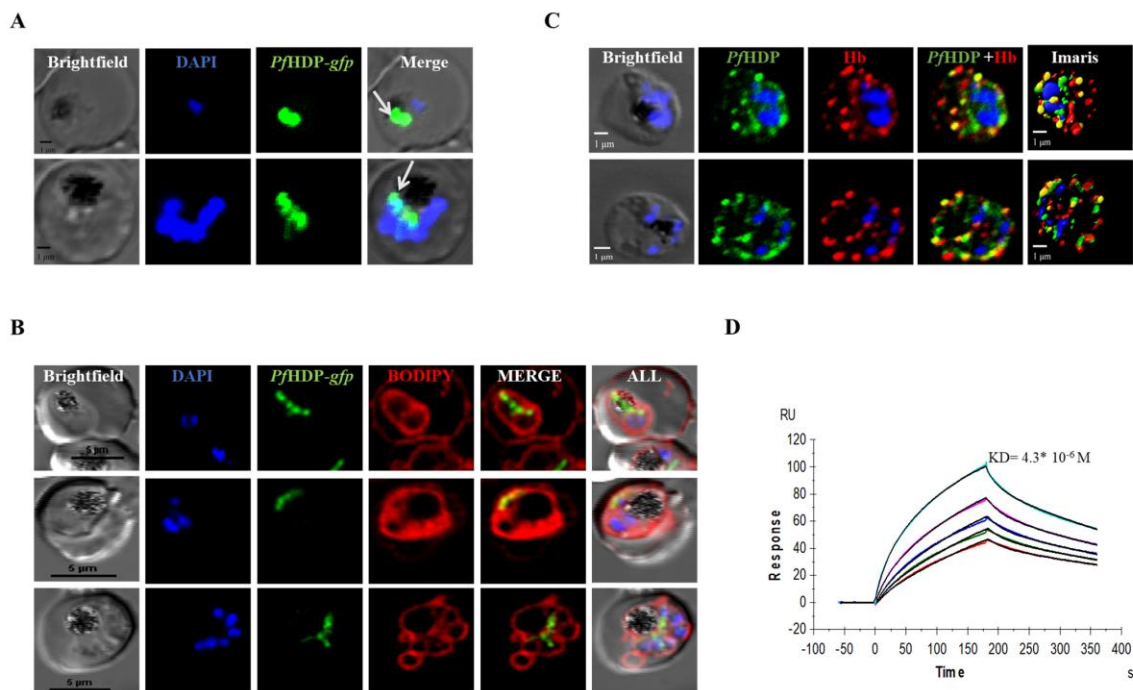

663

664 **Fig. 1.** A. Subcellular localization of PfHDP in PfHDP-GFP transgenic lines. The image  
665 shows PfHDP is trafficked to the vesicles of the parasite B. The BODIPY-TR ceramide stain,  
666 which stains the lipid membranes shows PfHDP-GFP are trafficked from vesicles to the  
667 parasite plasma membrane (C) PfHDP colocalizes with Hb, both inside the parasite as well as  
668 in the cytoplasm of erythrocyte (pearson coefficient co-relation - 0.8) (D) PfHDP interacts  
669 with Hb in an SPR experiment. The interaction is a two-state reaction, and the observed  
670 dissociation constant is 4.3\* 10<sup>-6</sup> M for the reaction.

A

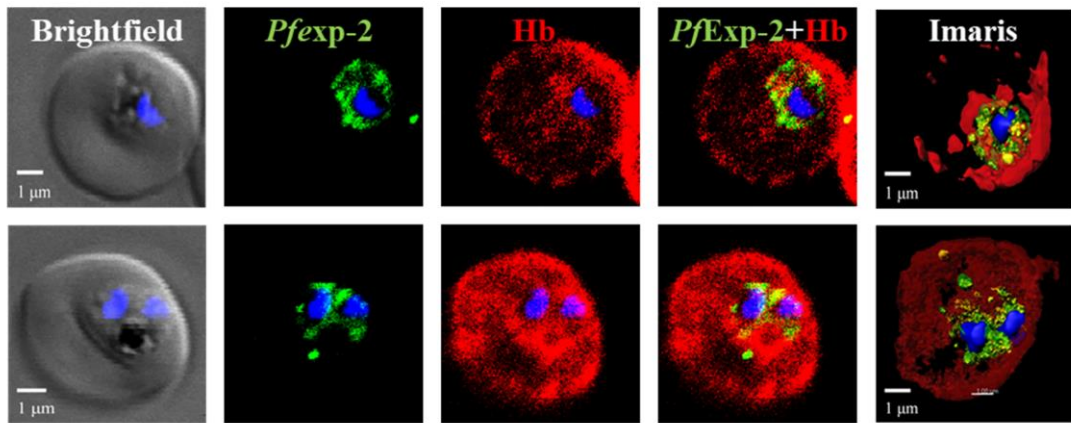

B

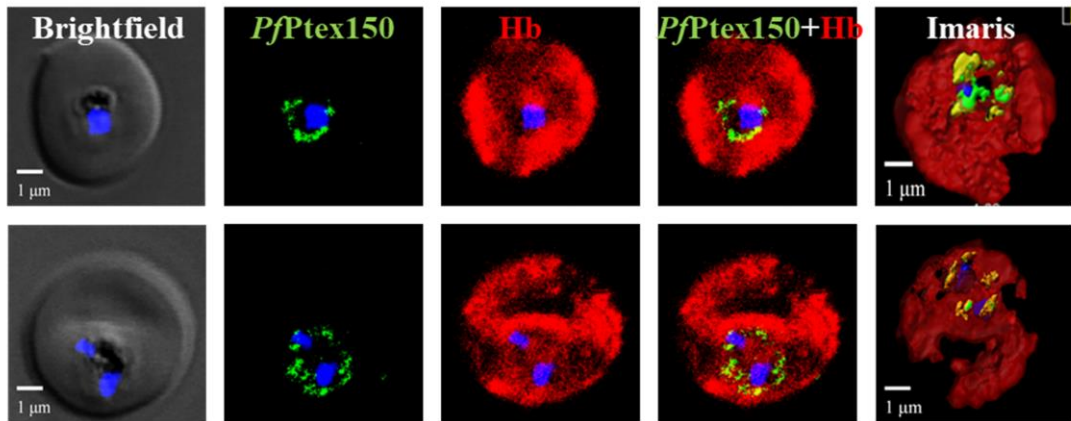

671

672 **Fig. 2.** Hb colocalized with members of translocon components, *Pfexp-2* (A) and *PfPTEX150*  
673 (B) with a pearson coefficient of 0.62 and 0.64, respectively.

**A**

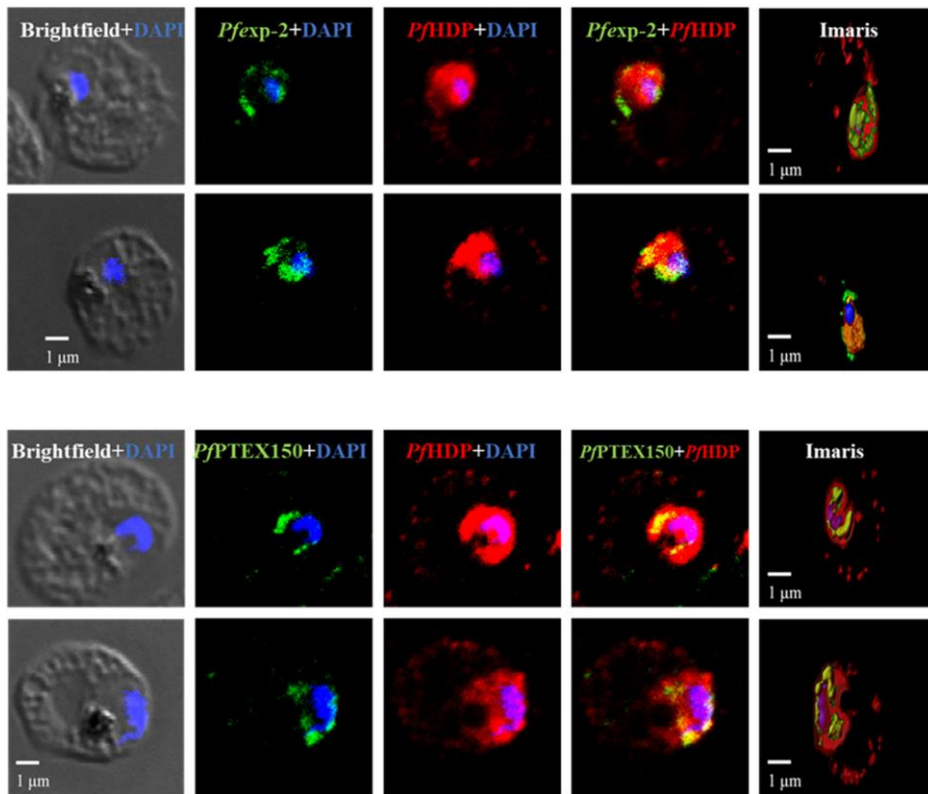

**B**

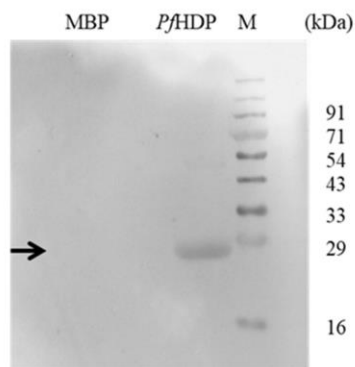

**C**

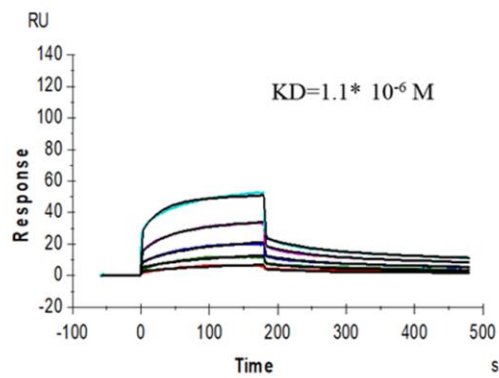

**D**

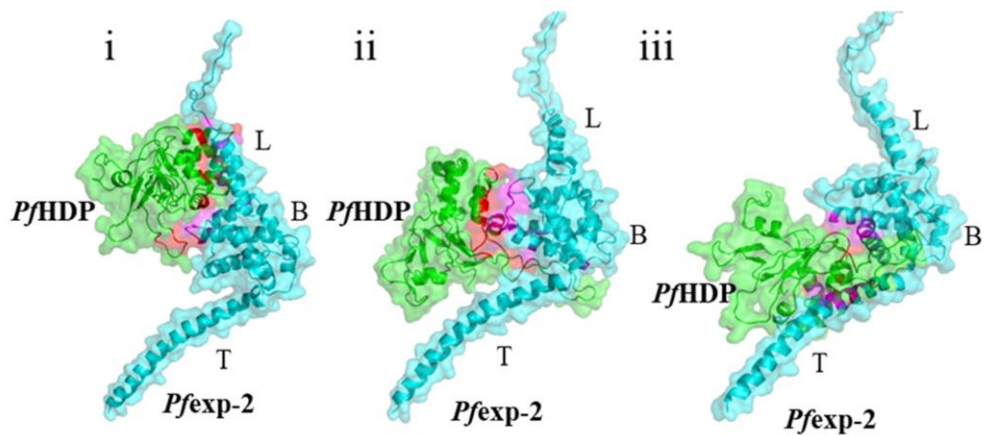

675 **Fig. 3.** (A) *Pf*HDP colocalizes with the members of translocon components; *Pfexp-2* and  
 676 *Pf*PTEX150 at the parasitophorous vacuolar membrane with a pearson coefficient of 0.74 and  
 677 0.60, respectively. (B) *Pfexp-2* interacts with *Pf*HDP in a far western experiment (C) *Pf*HDP  
 678 interacts with recombinant C-terminal *Pfexp-2* in an SPR experiment. The interaction is a  
 679 two-state reaction, and the dissociation constant is  $1.1 \times 10^{-6}$  M. (D) Conformational docking  
 680 patterns (i-iii) observed for The *Pfexp-2* (monomer)-*Pf*HDP complex. Green-*Pf*HDP, Cyan-  
 681 *Pfexp-2*, Red – *Pfexp-2* interacting region within  $4\text{\AA}$  of *Pf*HDP, Magenta - *Pf*HDP interacting  
 682 region within  $4\text{\AA}$  of *Pfexp-2*.

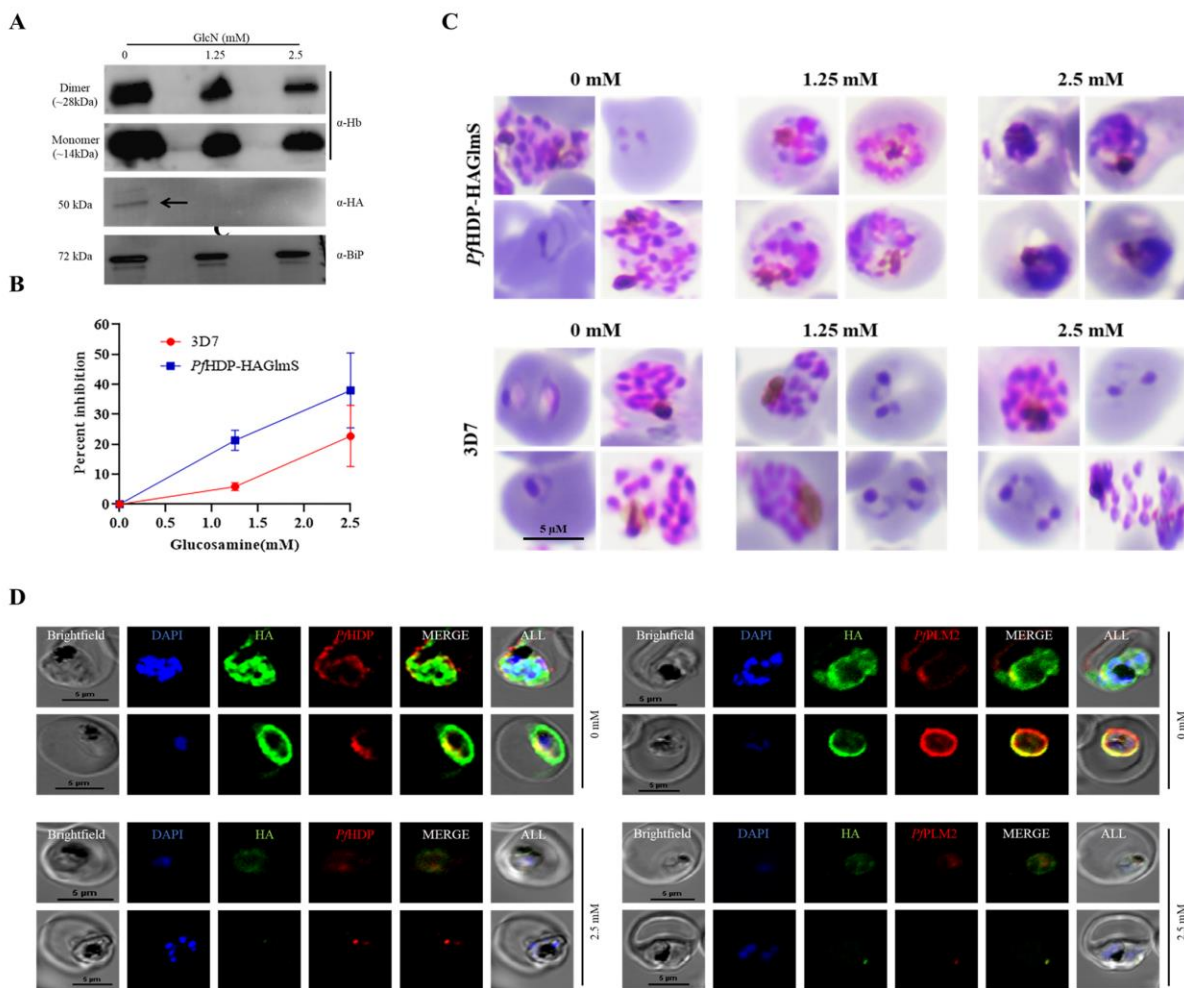

683

684 **Fig. 4.** (A) Effect of conditional knockdown of *Pf*HDP in parasites showing up to 45%  
 685 invasion inhibition. Data represents mean  $\pm$  SD; n = 3 experiments. (B) Western blot analysis  
 686 of lysate from *Pf*HDP-HA-glmS line with  $\alpha$ -HA rat serum and  $\alpha$ -Hb antibody. Hb uptake is  
 687 reduced in the knockdown parasites. Anti BiP was used as loading control. (C)  
 688 Representative Giemsa-stained smears highlighting the parasite stress in the trophozoite stage

689 following *PfHDP* knockdown. (D) Immunofluorescence assays show the low levels of  
690 *PfHDP* and plasmepsin-2 in knockdown lines.

691

692

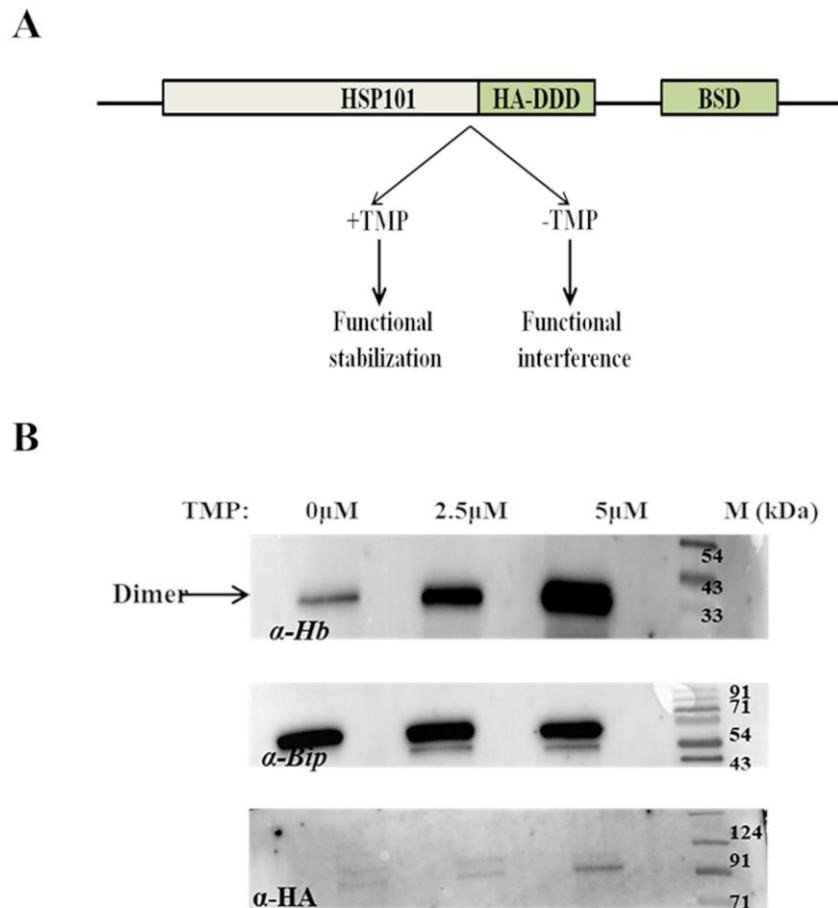

693 **Fig. 5.** HSP101 DDDHA knockdown parasites take up less Hb from the host erythrocyte  
694 cytoplasm. (A) Illustration of the HSP101 DDDHA transgenic construct (B) western blot to  
695 detect the Hb levels inside the parasite in HSP101 knockdown parasites. BiP is used as a  
696 loading control.

697



698 **Supplementary Figures**

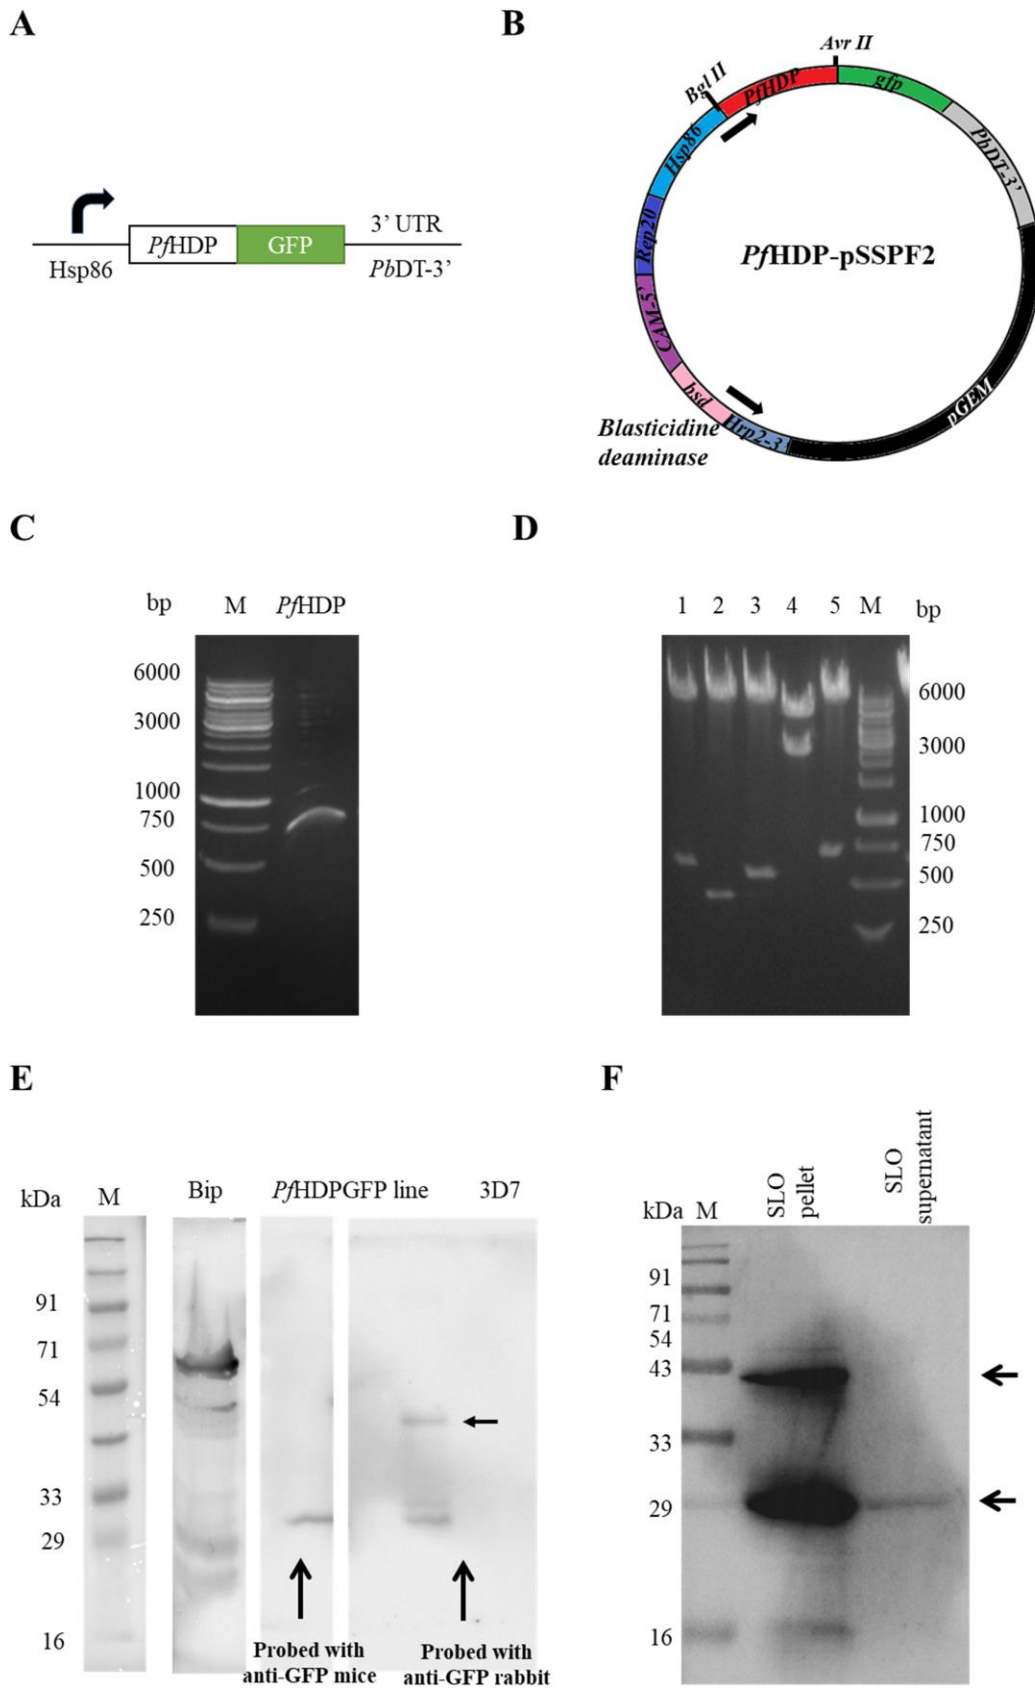

699

700 **Sup fig. 1.** Generation of *PfHDP*-GFP line in pSSPF2 vector. (A) Full length *PfHDP* gene  
701 cloned in pSSPF2 vector with GFP tag at 3' end under the control of HSP86 promoter (B)  
702 plasmid vector pSSPF2 for expressing gene products in malarial transfectants (C) PCR  
703 amplification of *PfHDP* gene from cDNA using the *PfHDP*-GFP FP and *PfHDP*-GFP RP  
704 primer set. (D) The construct *PfHDP*-pSSPF2 was checked for correct insertion of *PfHDP*  
705 and presence of other sequence regions using different sets of restriction enzymes (Lane 1:  
706 BglII/AvrII-HDP; Lane 2: BamHI/HindIII- blasticidine resistance; Lane3: EcoRI/HindIII-  
707 HRP 2-3', Lane 4: NotI/EcoRI- pGEM backbone, Lane 5: XhoI/AvrII: GFP (E) Western blot  
708 to confirm the expression of GFP fusion protein in the *PfHDP*-GFP transgenic line. *PfBiP*  
709 was used as a positive control. (F) *PfHDP*GFP detection in the SLO pellet and supernatant  
710 fractions suggesting *PfHDP* is transported to the erythrocyte cytosol.

**A**

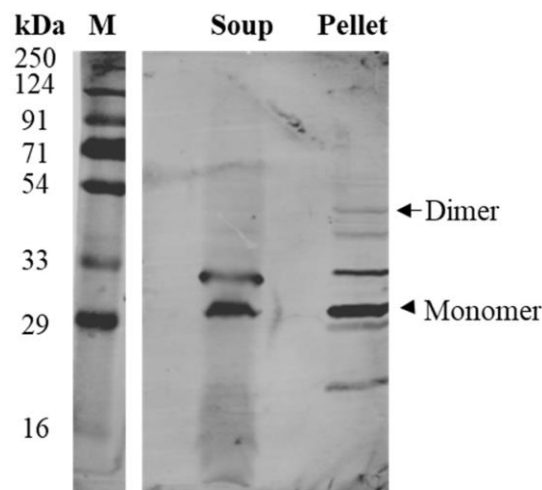

**B**

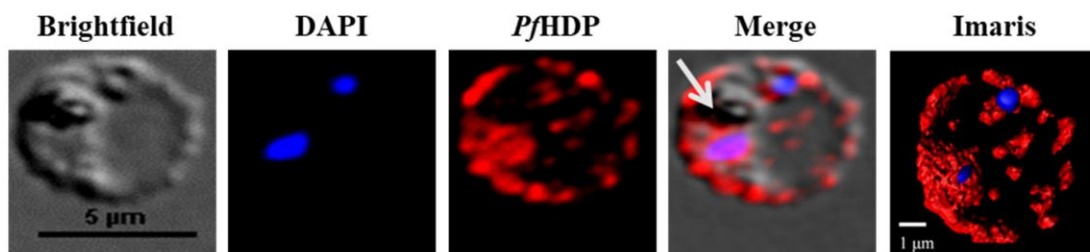

711

712 **Sup fig. 2.** (A) *PfHDP* is detected in both the fractions of SLO treated infected erythrocytes.  
713 The protein is detected in both the parasite cytoplasm and erythrocyte cytoplasm by *PfHDP*



714 antibodies in a western blot assay. (B) Immunofluorescence assay shows the localization of  
715 *PfHDP* (red) in both the erythrocyte cytosol and parasite cytoplasm.

716

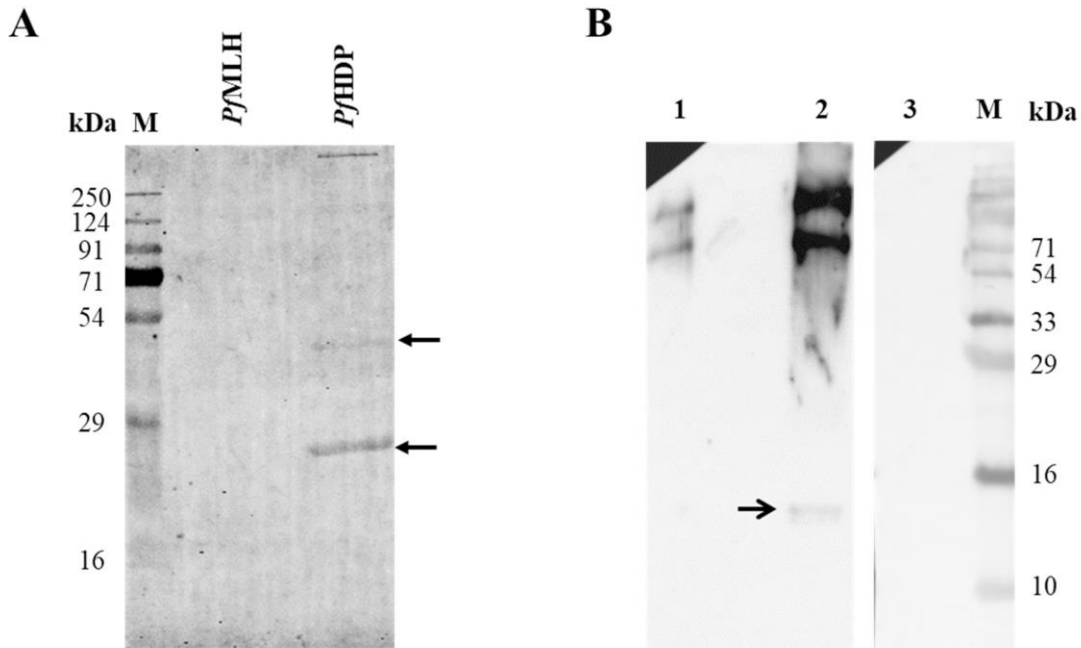

717

718 **Sup fig. 3.** (A) *PfHDP* interacts with Hb in a far western interaction experiment. Here,  
719 *PfMLH* was used as a negative control. (B) *PfHDP* and Hb interact with each other in a co-  
720 immunoprecipitation experiment. Lane 1 contains elute pulled from the mixture of *PfHDP*  
721 and Hb using Pre immune sera. Lane 2 contains elutes pulled from a mixture of *PfHDP* and  
722 Hb using the HDP antibody. Lane 3 contains an eluted mixture of HDP and ClpQ using the  
723 *PfHDP* antibody. The arrow shows Hb pulled by *PfHDP* antibody as probed by Hb antibody.

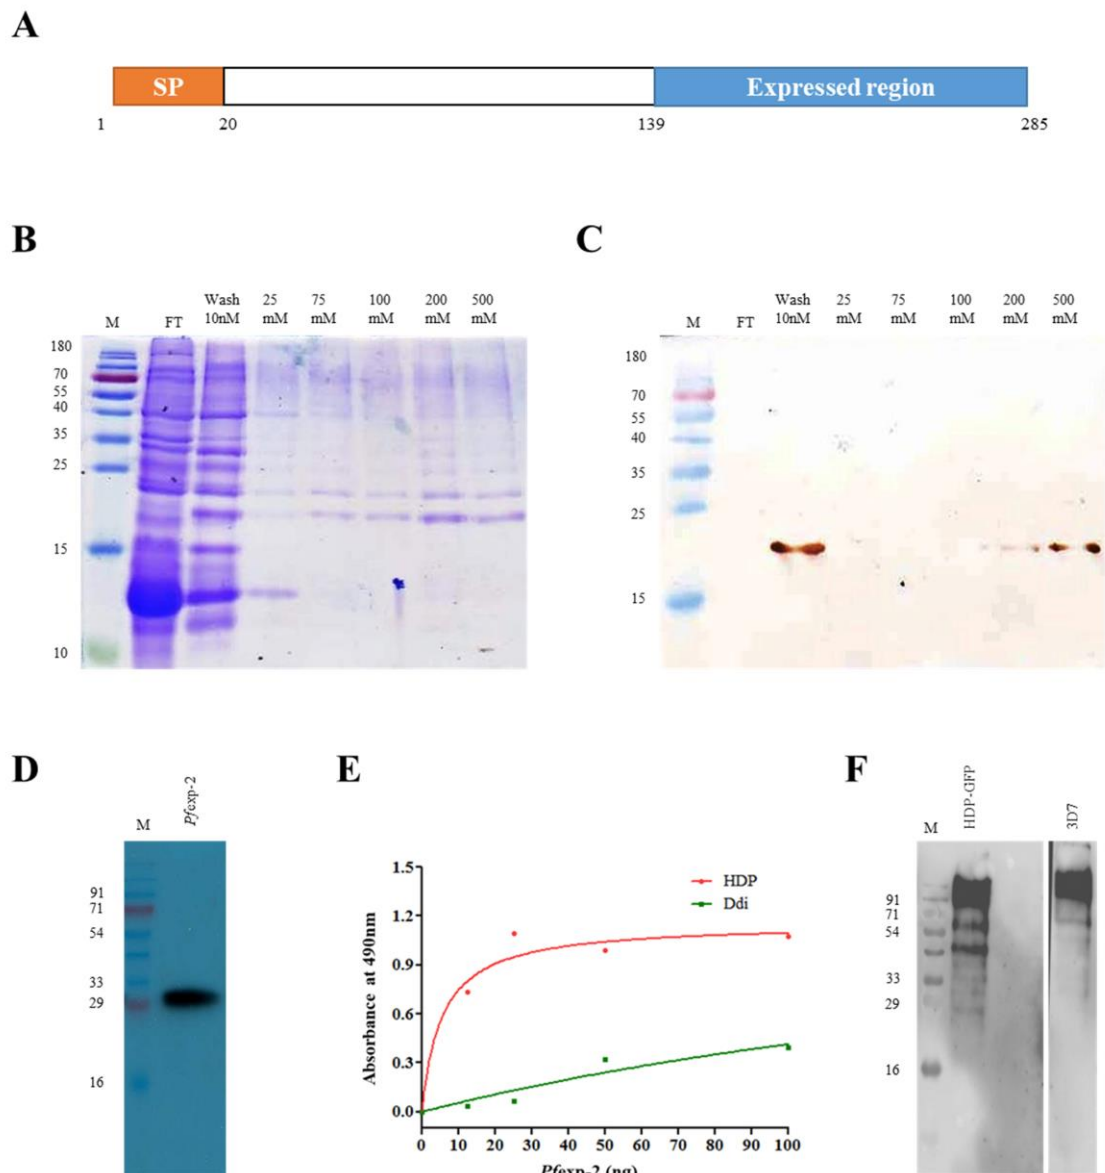

724

725 **Sup fig. 4.** (A) *Pfexp-2* - C-terminal from amino acids 139-285 was expressed in pET28b  
726 vector in *E. coli*. (B) Coomassie stained SDS-PAGE of different elutes of recombinant *Pfexp-*  
727 2 using urea purification strategy (C) Western blot of different fractions of recombinant  
728 purified *Pfexp-2* using His-HRP antibody (D) Antibody generated in rabbit against the  
729 recombinant *Pfexp-2* protein recognized the monomeric native protein in 3D7 parasite lysate  
730 (E) Recombinant *Pfexp-2* interacts with *PfHDP* in a dose dependent manner in an ELISA  
731 experiment. Recombinant *PfDdi* protein was used as a negative control. (F) western blot  
732 analysis of elutes of parasite lysate of *PfHDP-GFP* parasites immunoprecipitated with GFP  
733 antibody using anti- *exp-2* antibody detected *Pfexp-2* in a western blot analysis.

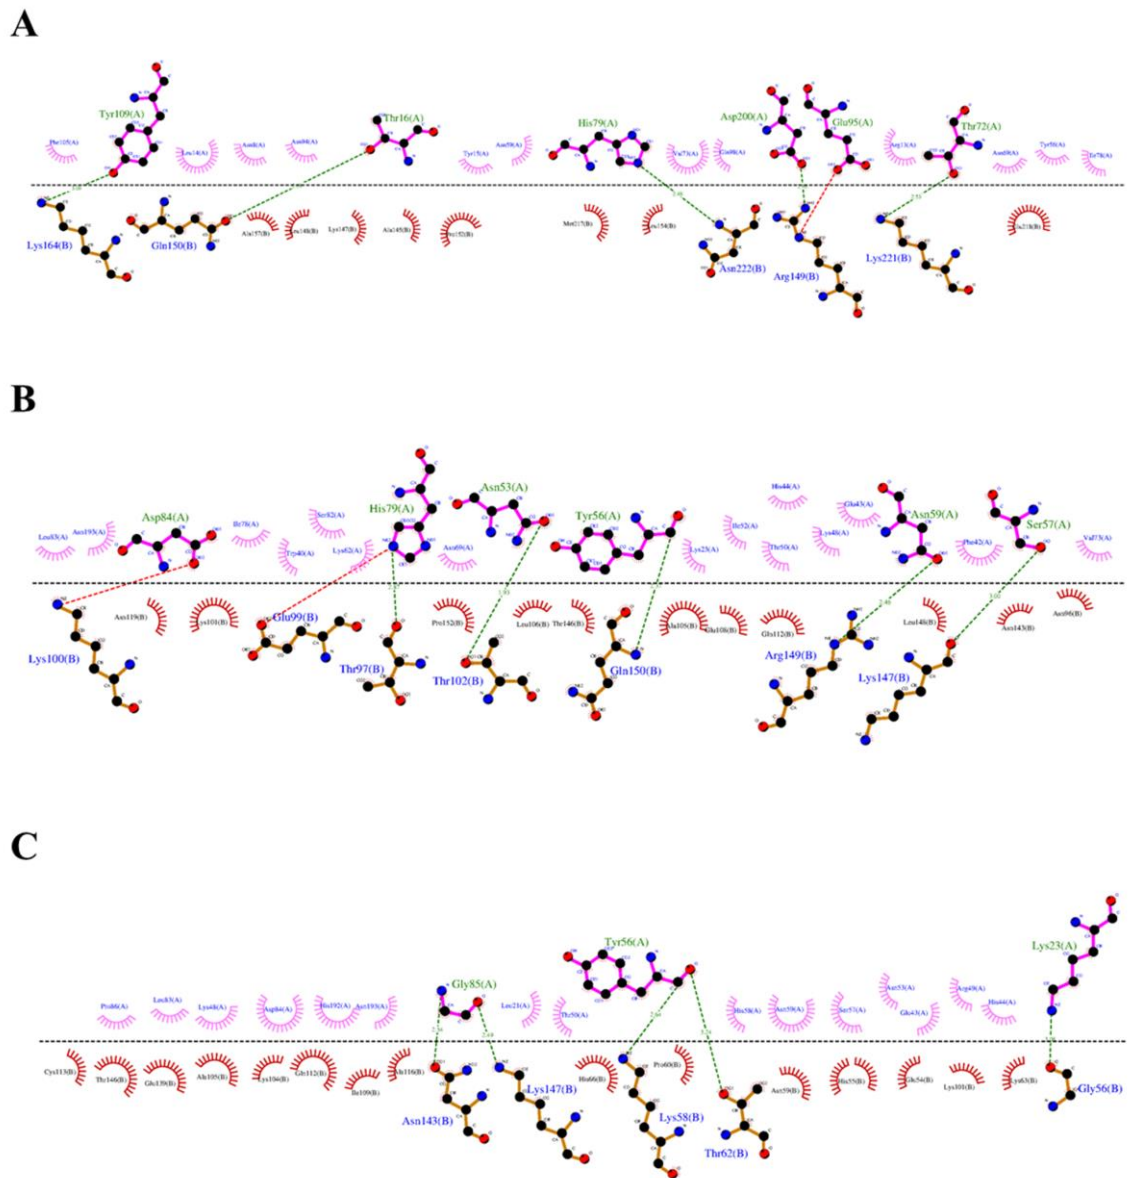

734

735 **Sup fig. 5.** DIMPLoT analysis map for *Pfexp-2* and *PfHDP* interacting residues in pose 1  
736 (A), pose 2 (B) and pose 3 (C).

**A**

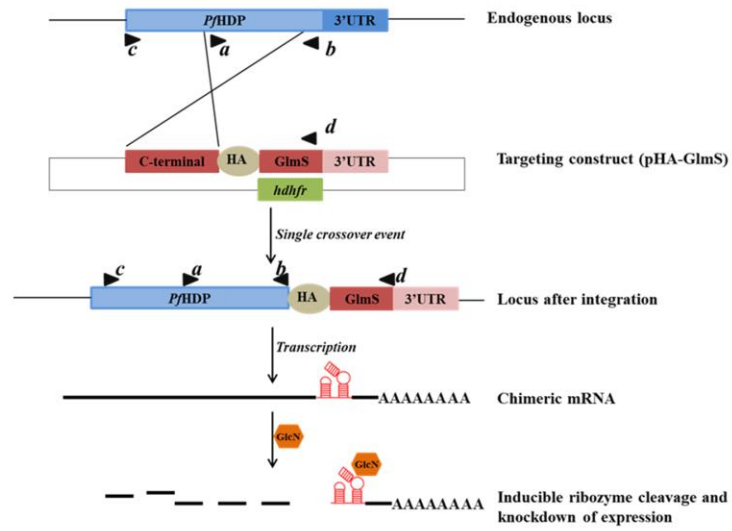

**B**

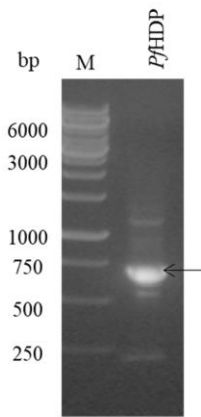

**C**

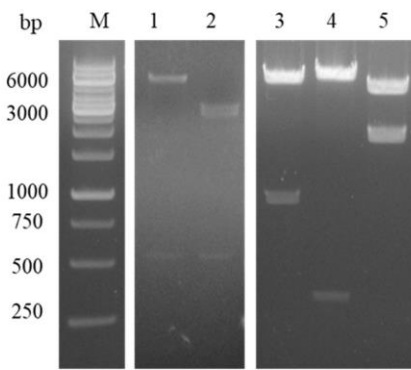

**D**

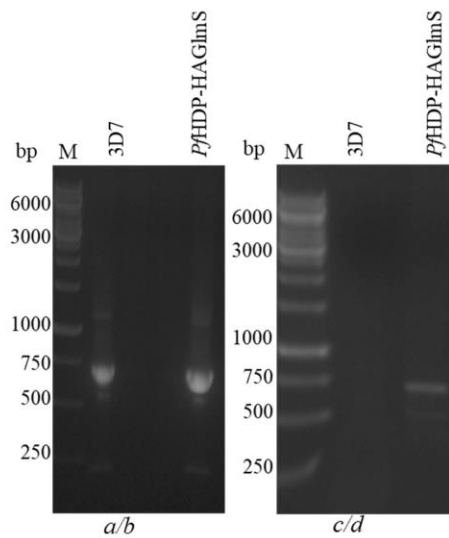

**E**

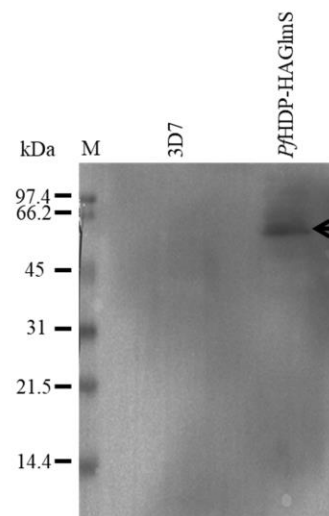

737

738 **Sup fig. 6.** Generation of *PfHDP-HAGlmS* line in pHA- GlmS vector. (A) Schematic of the  
739 GlmS ribozyme reverse genetic tool: The ribozyme is inserted in the 3'-UTR after the coding  
740 region so that it is present in the expressed mRNA. Following addition of the inducer,  
741 glucosamine, which binds to the ribozyme, the mRNA self-cleaves resulting in degradation of  
742 the mRNA and knock down of protein expression. (B) PCR amplification of *PfHDP* genomic  
743 sequence from gDNA using the *PfHDPGA\_FP* and *PfHDPGA\_RP* primer set (C) The  
744 construct *PfHDP-HAGlmS* was checked for correct insertion of HDP and presence of other  
745 sequence regions using different sets of restriction enzymes (Lane 1: BamHI/HindIII-DHFR;  
746 Lane 2: EcoRI/HindIII- HRP; Lane3: BglII/PstI-*PfHDP* gene, Lane 4: PstI/XhoI- HA\_glmS  
747 ribozyme, Lane 5: XhoI/SacI: 3'-UTR (D) PCR amplification to check the integration of  
748 *PfHDP-HAGlmS* in parasite genome. (E) Western blot of parasite lysates using anti- HA  
749 antibody shows expression of HA tag fused to the *PfHDP* genomic locus.

750

751 **Table 1.** List of proteins pulled down by GFP- Trap beads from lysates of *Pf*HDP-GFP  
752 parasites from *P. falciparum*.

| Gene ID       | Protein                              | MW (kDa) | Peptides |
|---------------|--------------------------------------|----------|----------|
| PF3D7_1446800 | Heme Detoxification Protein (HDP)    | 24.3     | 3        |
| PF3D7_1471100 | Exported protein 2 (EXP-2)           | 33.4     | 8        |
| PF3D7_1345100 | Thioredoxin 2 (TRX2)                 | 18.6     | 1        |
| PF3D7_1105600 | Translocon component PTEX88 (PTEX88) | 90.7     | 1        |
| PF3D7_1116800 | Heat shock protein 101 (HSP101)      | 102.8    | 4        |

753

754 **Table 2.** List of proteins pulled down by anti-Hb antibody from lysates of *P. falciparum*  
755 parasites.

| Gene ID       | Protein                                | MW (kDa) | Peptides |
|---------------|----------------------------------------|----------|----------|
| PF3D7_1436300 | Translocon component PTEX150 (PTEX150) | 25.74    | 7        |
| PF3D7_1105600 | Translocon component PTEX88 (PTEX88)   | 90.7     | 1        |
| PF3D7_1471100 | Exported protein 2 (EXP-2)             | 33.4     | 5        |
| PF3D7_1116800 | Heat shock protein 101 (HSP101)        | 102.8    | 7        |
| PF3D7_1345100 | Thioredoxin-2 (TRX-2)                  | 18.6     | 5        |

756

757 **Supplementary Table 1.** The list of *Pf*exp-2 and *Pf*HDP interacting residues involved in  
758 protein-protein interaction.
